# Supplementary material
Source: Research Square preprint supplement (doi:10.21203/rs.3.rs-9515312/v1)
Supplement: Supplementary file 1 [file 2c2822ade37391362e727f1c.pdf]

**Supplementary table 1.** Transects where tick samplings were performed in the Natural Protected Area of Doñana. Dates in which each transect was sampled is marked in grey.

| Transect* | Province | Municipal boundary | Area                               | Coordinate |         | Habitat                                                                            | Sampling dates |               |               |               |               |               |               |
|-----------|----------|--------------------|------------------------------------|------------|---------|------------------------------------------------------------------------------------|----------------|---------------|---------------|---------------|---------------|---------------|---------------|
|           |          |                    |                                    | X          | Y       |                                                                                    | S-1<br>Apr-18  | S-2<br>May-18 | S-3<br>Aug-18 | S-4<br>Oct-18 | S-5<br>Nov-18 | S-6<br>Feb-19 | S-7<br>Mar-19 |
| D1        | Huelva   | Almonte            | Laguna de las pajas                | 181187     | 4106049 | Grassland on the shore of the lake                                                 |                |               |               |               |               |               |               |
| D2        | Huelva   | Almonte            | Laguna huerto Bejarano             | 180510     | 4106893 | The shore of the lake with Mediterranean shrub (rockrose, rosemary, lentisk, etc.) |                |               |               |               |               |               |               |
| D3        | Huelva   | Bonares            | Arboreto del Villar I              | 173551     | 4126174 | Cork oak and Mediterranean shrub (rockrose, rosemary, lentisk, etc.)               |                |               |               |               |               |               |               |
| D4        | Huelva   | Bonares            | Arboreto del Villar II             | 173085     | 4126562 | Cork oak and Mediterranean shrub (rockrose, rosemary, lentisk, etc.)               |                |               |               |               |               |               |               |
| D5        | Huelva   | Almonte            | Laguna de Santa Olalla             | 190034     | 4098488 | Grassland on the shore of the lake and scrubs of sage-leaved rockrose              |                |               |               |               |               |               |               |
| D6        | Huelva   | Almonte            | El Puntal-Helechal                 | 193599     | 4098535 | Fern under a cork oak                                                              |                |               |               |               |               |               |               |
| D7        | Huelva   | Hinojos            | Casa del Pichiricha (Coto del Rey) | 193272     | 4114582 | Grassland                                                                          |                |               |               |               |               |               |               |
| D8        | Huelva   | Hinojos            | Raya de los Álamos                 | 195412     | 4114499 | Cork oak and Mediterranean shrub (rockrose, rosemary, lentisk, etc.)               |                |               |               |               |               |               |               |
| D9        | Huelva   | Almonte            | Rocina Laguna                      | 188825     | 4114833 | Pine forest on the shore of the lake with fens and scrubs                          |                |               |               |               |               |               |               |
| D10       | Huelva   | Almonte            | Sendero Acebrón                    | 185082     | 4116876 | Cork oak, Mediterranean shrub and grassland with fan palms                         |                |               |               |               |               |               |               |
| D11       | Huelva   | Almonte            | Toril de Manecorro                 | 190510     | 4113701 | Grassland close to the lake                                                        |                |               |               |               |               |               |               |
| D12       | Huelva   | Almonte            | Casa Hato Villa                    | 191804     | 4111984 | Grassland at the edge of marshes                                                   |                |               |               |               |               |               |               |
| D13       | Huelva   | Almonte            | El Guaperal zona de acampada       | 191484     | 4109023 | Grassland, scrub and eucalyptus                                                    |                |               |               |               |               |               |               |
| D14       | Huelva   | Almonte            | Toril Casa del Puntal              | 194058     | 4097193 | Grassland                                                                          |                |               |               |               |               |               |               |
| D15       | Huelva   | Hinojos            | Cuevas de Conejos.                 | 193897     | 4113834 | Cork oak forest and Mediterranean shrub                                            |                |               |               |               |               |               |               |

\* Neighbouring areas (buffer areas) were sampled in August (n=3; D4, D6 and D8), October (n=9; D1-2, D4, D6-9 and D12-13), November (n=4; D4-7), February (n=3; D5, D7 and D10) and March (n=5; D3-D7).

**Supplementary table 2.** Transects where tick samplings were performed in the Natural Protected Area of Los Alcornocales (South Spain). Dates in which each transect was sampled is marked in grey.

| Transect* | Province | Municipal boundary    | Area                                        | Coordinate |         | Habitat                                                                              | Sampling dates |               |               |               |               |               |               |  |
|-----------|----------|-----------------------|---------------------------------------------|------------|---------|--------------------------------------------------------------------------------------|----------------|---------------|---------------|---------------|---------------|---------------|---------------|--|
|           |          |                       |                                             | X          | Y       |                                                                                      | S-1<br>Apr-18  | S-2<br>Jun-18 | S-3<br>Aug-18 | S-4<br>Oct-18 | S-5<br>Dec-18 | S-6<br>Feb-19 | S-7<br>Mar-19 |  |
| A1        | Cádiz    | Alcalá de los Gazules | Cañadas de los ratones. Conejeras           | 254254     | 4032969 | Grassland                                                                            |                |               |               |               |               |               |               |  |
| A2        | Cádiz    | Alcalá de los Gazules | La Peguera                                  | 262887     | 4027813 | Grassland at the edge of the Mediterranean scrub                                     |                |               |               |               |               |               |               |  |
| A3        | Cádiz    | Alcalá de los Gazules | Finca Buenas Noches                         | 267824     | 4030159 | Grassland at the edge of the Mediterranean scrub (rockrose, rosemary, lentisk, etc.) |                |               |               |               |               |               |               |  |
| A4        | Cádiz    | Alcalá de los Gazules | Pradera en la Cañana de los ratones         | 254227     | 4032857 | Grassland                                                                            |                |               |               |               |               |               |               |  |
| A5        | Cádiz    | Los Barrios           | Pantano Monte La Torre                      | 275161     | 4003948 | Grassland on the shore of the lake                                                   |                |               |               |               |               |               |               |  |
| A6        | Cádiz    | Los Barrios           | Cañada Real Botafuegos-Jaramillo            | 271244     | 4010225 | Grassland at the edge of the Mediterranean scrub (rockrose, rosemary, lentisk, etc.) |                |               |               |               |               |               |               |  |
| A7        | Cádiz    | Los Barrios           | Sendero de Valdeinfierno                    | 266752     | 4012397 | Cork oak forest and Mediterranean scrub (rockrose, heather, etc.)                    |                |               |               |               |               |               |               |  |
| A8        | Cádiz    | Los Barrios           | La Teja                                     | 268097     | 4018499 | Grassland and Mediterranean scrub                                                    |                |               |               |               |               |               |               |  |
| A9        | Málaga   | Cortes de la Frontera | Cerca de PerezGil                           | 268478     | 4046307 | "Bujeo" grasslands                                                                   |                |               |               |               |               |               |               |  |
| A10       | Cádiz    | Algar                 | Carril Finca la Atalaya                     | 266809     | 4061435 | "Bujeo" grasslands next to riverside                                                 |                |               |               |               |               |               |               |  |
| A11       | Cádiz    | Jerez de la Frontera  | Arroyo entrada Montes de Jerez              | 268611     | 4054374 | Riverside meadows                                                                    |                |               |               |               |               |               |               |  |
| A12       | Cádiz    | Algar                 | Garganta Peñalpargate                       | 266687     | 4061715 | "Bujeo" grasslands next to riverside                                                 |                |               |               |               |               |               |               |  |
| A13       | Cádiz    | Alcalá de los Gazules | Praderas con casas subiendo a Buenas Noches | 265239     | 4030360 | Grassland and cork oak forest                                                        |                |               |               |               |               |               |               |  |
| A14       | Málaga   | Cortes de la Frontera | Patio de Corcha                             | 273954     | 4043661 | Grassland at the edge of the Mediterranean scrub                                     |                |               |               |               |               |               |               |  |
| A15       | Cádiz    | Jerez de la Frontera  | Finca Rojitan, Embalse de los Hurones.      | 270293     | 4058386 | River valley forests                                                                 |                |               |               |               |               |               |               |  |
| A16       | Cádiz    | Alcalá de los Gazules | CR Corzo, el Picacho.                       | 262942     | 4046108 | Cork oak forest and Mediterranean scrub (rockrose, heather, etc.)                    |                |               |               |               |               |               |               |  |

\*Neighbouring areas (buffer areas) were sampled in August (n=5; A5-6, A8-9 and A14), October (n=3; A9, A11 and A14), December (n=3; A9, A11 and A13) and February (n=4; A5-7 and A13).

**Supplementary table 3:** PCR primer pairs and conditions used in this study for the screening of tick-borne microorganisms.

| Organisms                                        | Target gene                         | Primer sequence (5' → 3')                                                                                       | Fragment size (bp)                                                                                                       | References |
|--------------------------------------------------|-------------------------------------|-----------------------------------------------------------------------------------------------------------------|--------------------------------------------------------------------------------------------------------------------------|------------|
| Ticks                                            | 16S rRNA                            | F:CTGCTCAATGATTTTTTAAATTGCTGTGG<br>R:CCGGTCTGAACTCAGATCAAGT                                                     | 456                                                                                                                      | [1]        |
|                                                  | TROSPA                              | F: GTAAACATCGGCCTAATGG<br>R: GGAAAAAATAATGTTAAAAACACC<br>F: GTTGTTACAGCGAATACT<br>R: GAAAAAATATTAGAACATTAACACTC | 362*<br>233†                                                                                                             | [2]        |
| <b>Borrelia spp.</b>                             | <i>flaB</i> (Lyme group)            | F1: AARGAATTGGCAGTTCAATC<br>R1: GCATTTTCWATTTTAGCAAGTGATG                                                       | 497                                                                                                                      | [3]        |
|                                                  |                                     | F2: ACATATTCAGATGCAGACAGAGGTTCTA<br>R2: GAAGGTGCTGTAGCAGGTGCTGGCTGT                                             | 389                                                                                                                      | [4]        |
|                                                  | <i>g/pQ</i> (Relapsing fever group) | F1: ATGGGTTCAAACAAAAAGTCACC<br>R1: CATTACTGTGTGTCAGTAAAATCTGTAATATACCATCTAC                                     | 920                                                                                                                      | [5]        |
|                                                  |                                     | F2: ATGGGTTCAAACAAAAAGTCACC<br>R2: CCAGGGTCCAATTCCATCAGAATATTGTGCAAC                                            | 700                                                                                                                      | [6]        |
| <b>Rickettsia spp.</b>                           | <i>ompA</i> (Spotted fever group)   | F1: ATGGCGAATATTTCTCCAAAA<br>R1: GTTCCGTTAATGGCAGCATCT<br>F2: ATGGCGAATATTTCTCCAAAA<br>R2: AGTGCAGCATTGCTCCCCCT | 631<br>532                                                                                                               | [7,8]      |
|                                                  |                                     | <i>ompB</i> †                                                                                                   | F1: GTAACCGGAAGTAATCGTTTCGTAA<br>R1: GCTTTATAACCAGCTAAACCACC<br>F2: GTTTAATACGTGCTGCTAACCAA<br>R2: GGTTCGGCCATATACCATAAG | 420<br>230 |
| <b>Anaplasma / Ehrlichia / Neoehrlichia spp.</b> | groESL                              | F1: AITGGGCTGGTAITGAAAT<br>R1: CCICCGIACIAIACCTTC<br>F2: ATWGCWAARGAAGCATAGTC<br>R2: CTCAACAGCAGCTCTAGTAGC      | 1350<br>1297                                                                                                             | [10]       |
| <b>Anaplasma phagocytophilum</b>                 | msp2                                | F1:CCAGCGTTTAGCAAGATAAGAG<br>R1:GCCCAGTAACAACATCATAAGC                                                          | 380                                                                                                                      | [11]       |
| <b>Ehrlichia spp.</b> ‡                          | 16S rRNA                            | F1: GAACGAACGCTGGCGGCAAGC<br>R1: AGTAYCGRACCAGATAGCCGC                                                          | 696                                                                                                                      | [12,13]    |
|                                                  | <i>gltA</i>                         | F1:ATGTCTACTGCTGCTTGTGA<br>R1: ATGACCAGTATATAACTGACGTG<br>F2:ATGTCTACTGCTGCTTGTGA<br>R2: GAGCAGACCAACCAGATGTTC  | 1098<br>1030                                                                                                             | [13,14]    |
| <b>Crimean-Congo haemorrhagic fever virus</b> ‡  | S segment                           | F1: TCTCAAAGAAACACGTGCC<br>R1: CCTTTTTGAACTCTTCAAACC<br>Probe: ACTCAAGKAACTGTGGGCGTAAG                          | 122                                                                                                                      | [15]       |
|                                                  |                                     | F1: TTGTGTTCCAGATGGCCAGC<br>R1: CTTAAGGCTGCCGTGTTTGC<br>F2: GAAGCAACCAARTTCTGTGC<br>R2: AAACCTATGTCTTCTCTCC     | 307<br>221                                                                                                               | [16]       |
|                                                  |                                     | F1: AATGTGCCGAACCTGGACAG<br>R1: TGCGACAAGTGCAATCCCG<br>F2: ATCAGATGGCCAGTGCAACC<br>R2: ACTCCCTGCACCACTCAATG     | 593<br>469                                                                                                               | [16]       |
|                                                  |                                     |                                                                                                                 |                                                                                                                          |            |

|                             |     |      |
|-----------------------------|-----|------|
| F1: AARGGAAATGGACTTRTGGGA   |     | [17] |
| R1: GCAAGGCCTGTWGCACAAAGTGC | 605 |      |
| F2: TGGAYACYTTACAAACTCC     |     |      |
| R2: GCAAGGCCTGTWGCACAAAGTGC | 621 |      |

bp: base pairs; \* amplicon size corresponding to *Ixodes ricinus*; †amplicon size corresponding to *Ixodes inopinatus*; ‡Only performed to selected samples

## References:

- (1) Black WC, Piesman J. Phylogeny of hard- and soft-tick taxa (Acari: Ixodida) based on mitochondrial 16S rDNA sequences. Proc Natl Acad Sci U S A. 1994;91(21):10034-8. doi: 10.1073/pnas.91.21.10034
- (2) Hrazdilova K, Danek O, Hrbatova A, Cervena B, Noskova E, Adamik P, Votypka J, Mihalca AD, Nouredine M, Modry D, Zurek L. Genetic analysis challenges the presence of *Ixodes inopinatus* in Central Europe: development of a multiplex PCR to distinguish *I. inopinatus* from *I. ricinus*. Parasit Vectors. 2023;16(1):354. doi: 10.1186/s13071-023-05971-2.
- (3) Clark K, Hendricks A, Burge D. Molecular identification and analysis of *Borrelia burgdorferi* sensu lato in lizards in the southeastern United States. Appl Environ Microbiol. 2005;71(5):2616-25. doi: 10.1128/AEM.71.5.2616-2625.2005.
- (4) Johnson BJ, Happ CM, Mayer LW, Piesman J. Detection of *Borrelia burgdorferi* in ticks by species-specific amplification of the flagellin gene. Am J Trop Med Hyg. 1992;47(6):730-41. doi: 10.4269/ajtmh.1992.47.730.
- (5) Hovius JW, de Wever B, Sohne M, Brouwer MC, Coumou J, Wagemakers A, Oei A, Knol H, Narasimhan S, Hodiamont CJ, Jahfari S, Pals ST, Horlings HM, Fikrig E, Sprong H, van Oers MH. A case of meningoencephalitis by the relapsing fever spirochaete *Borrelia miyamotoi* in Europe. Lancet. 2013;382(9892):658. doi: 10.1016/S0140-6736(13)61644-X.
- (6) Wagemakers A, Jahfari S, de Wever B, Spanjaard L, Starink MV, de Vries HJC, Sprong H, Hovius JW. *Borrelia miyamotoi* in vectors and hosts in The Netherlands. Ticks Tick Borne Dis. 2017;8(3):370-374. doi: 10.1016/j.ttbdis.2016.12.012.

- (7) Regnery RL, Spruill CL, Plikaytis BD. Genotypic identification of rickettsiae and estimation of intraspecies sequence divergence for portions of two rickettsial genes. *J Bacteriol.* 1991;173(5):1576-89. doi: 10.1128/jb.173.5.1576-1589.1991.
- (8) Roux V, Fournier PE, Raoult D. Differentiation of spotted fever group rickettsiae by sequencing and analysis of restriction fragment length polymorphism of PCR-amplified DNA of the gene encoding the protein rOmpA. *J Clin Microbiol.* 1996;34(9):2058-65. doi: 10.1128/jcm.34.9.2058-2065.1996.
- (9) Choi YJ, Jang WJ, Kim JH, Ryu JS, Lee SH, Park KH, Paik HS, Koh YS, Choi MS, Kim IS. Spotted fever group and typhus group rickettsioses in humans, South Korea. *Emerg Infect Dis.* 2005;11(2):237-244. doi: 10.3201/eid1102.040603.
- (10) Liz JS, Sumner JW, Pfister K, Brossard M. PCR detection and serological evidence of granulocytic ehrlichial infection in roe deer (*Capreolus capreolus*) and chamois (*Rupicapra rupicapra*). *J Clin Microbiol.* 2002 Mar;40(3):892-7. doi: 10.1128/JCM.40.3.892-897.2002.
- (11) Zeidner NS, Burkot TR, Massung R, Nicholson WL, Dolan MC, Rutherford JS, Biggerstaff BJ, Maupin GO. Transmission of the agent of human granulocytic ehrlichiosis by *Ixodes spinipalpis* ticks: evidence of an enzootic cycle of dual infection with *Borrelia burgdorferi* in Northern Colorado. *J Infect Dis.* 2000;182(2):616-9. doi: 10.1086/315715.
- (12) Rar VA, Livanova NN, Panov VV, Doroschenko EK, Pukhovskaya NM, Vysochina NP, Ivanov LI. Genetic diversity of *Anaplasma* and *Ehrlichia* in the Asian part of Russia. *Ticks Tick Borne Dis.* 2010;1(1):57-65. doi: 10.1016/j.ttbdis.2010.01.002.
- (13) Rar VA, Pukhovskaya NM, Ryabchikova EI, Vysochina NP, Bakhmetyeva SV, Zdanovskaia NI, Ivanov LI, Tikunova NV. Molecular-genetic and ultrastructural characteristics of '*Candidatus Ehrlichia khabarensis*', a new member of the *Ehrlichia* genus. *Ticks Tick Borne Dis.* 2015;6(5):658-67. doi: 10.1016/j.ttbdis.2015.05.012.
- (14) Cruz AC, Zweygarth E, Ribeiro MF, da Silveira JA, de la Fuente J, Grubhoffer L, Valdés JJ, Passos LM. New species of *Ehrlichia* isolated from *Rhipicephalus (Boophilus) microplus* shows

an ortholog of the *E. canis* major immunogenic glycoprotein gp36 with a new sequence of tandem repeats. *Parasit Vectors*. 2012;5:291. doi: 10.1186/1756-3305-5-291.

- (15) Atkinson B, Chamberlain J, Logue CH, Cook N, Bruce C, Dowall SD, Hewson R. Development of a real-time RT-PCR assay for the detection of Crimean-Congo hemorrhagic fever virus. *Vector Borne Zoonotic Dis*. 2012;12(9):786-93. doi: 10.1089/vbz.2011.0770.
- (16) Midilli K, Gargili A, Ergonul O, Eleveli M, Ergin S, Turan N, Sengöz G, Ozturk R, Bakar M. The first clinical case due to AP92 like strain of Crimean-Congo Hemorrhagic Fever virus and a field survey. *BMC Infect Dis*. 2009;9:90. doi: 10.1186/1471-2334-9-90.
- (17) Midilli K, Gargili A, Ergonul O, Sengöz G, Ozturk R, Bakar M, Jongejan F. Imported Crimean-Congo hemorrhagic fever cases in Istanbul. *BMC Infect Dis*. 2007;7:54. doi: 10.1186/1471-2334-7-54.

**Supplementary table 4.** Number of ticks captured in each transect in the Natural Protected Areas of Doñana and Los Alcornocales from April 2018 to

March 2019.

| Transect <sup>1</sup> | <i>D. marginatus</i> |    | <i>H. punctata</i> |   |   |   | <i>Hy. lusitanicum</i> |    |   |   | <i>Hy. marginatum</i> |   | <i>I. acuminatus</i> |   |   |   | <i>I. ricinus</i> |   | <i>Rh. annulatus</i> |    | <i>Rh. bursa</i> |   |   | <i>Rh. pusillus</i> |   | <i>Rh. sanguineus</i> |  |
|-----------------------|----------------------|----|--------------------|---|---|---|------------------------|----|---|---|-----------------------|---|----------------------|---|---|---|-------------------|---|----------------------|----|------------------|---|---|---------------------|---|-----------------------|--|
|                       | M                    | F  | L                  | N | M | F | L                      | N  | M | F | L                     | F | M                    | N | M | F | L                 | N | L                    | M  | F                | M | F | M                   | F |                       |  |
| D1                    | 0                    | 0  | 0                  | 0 | 0 | 0 | 0                      | 0  | 0 | 1 | 0                     | 0 | 0                    | 0 | 0 | 0 | 22                | 0 | 0                    | 0  | 0                | 0 | 0 | 0                   | 1 | 1                     |  |
| D2                    | 0                    | 0  | 0                  | 0 | 0 | 0 | 0                      | 2  | 0 | 1 | 0                     | 0 | 0                    | 0 | 0 | 0 | 1                 | 0 | 0                    | 0  | 0                | 0 | 0 | 0                   | 0 | 0                     |  |
| D3                    | 6                    | 7  | 0                  | 0 | 0 | 0 | 0                      | 0  | 0 | 1 | 0                     | 0 | 0                    | 0 | 0 | 0 | 0                 | 0 | 0                    | 0  | 0                | 0 | 0 | 0                   | 1 | 4                     |  |
| D4                    | 0                    | 1  | 0                  | 0 | 0 | 0 | 0                      | 44 | 5 | 8 | 0                     | 0 | 0                    | 0 | 0 | 0 | 0                 | 0 | 0                    | 0  | 0                | 0 | 0 | 1                   | 1 |                       |  |
| D5                    | 0                    | 3  | 0                  | 6 | 0 | 1 | 21                     | 11 | 4 | 0 | 33                    | 0 | 0                    | 0 | 0 | 0 | 0                 | 0 | 24                   | 5  | 2                | 1 | 0 | 3                   | 1 |                       |  |
| D6                    | 0                    | 0  | 0                  | 1 | 0 | 0 | 0                      | 3  | 0 | 0 | 0                     | 0 | 0                    | 0 | 0 | 0 | 74                | 0 | 0                    | 11 | 4                | 0 | 0 | 2                   | 0 |                       |  |
| D7                    | 8                    | 10 | 0                  | 0 | 0 | 0 | 0                      | 0  | 5 | 4 | 0                     | 0 | 0                    | 0 | 0 | 0 | 0                 | 0 | 0                    | 0  | 1                | 0 | 1 | 0                   | 0 |                       |  |
| D8                    | 0                    | 0  | 0                  | 0 | 0 | 0 | 142                    | 39 | 5 | 4 | 0                     | 0 | 0                    | 0 | 1 | 0 | 29                | 1 | 0                    | 0  | 0                | 0 | 0 | 0                   | 0 |                       |  |
| D9                    | 0                    | 0  | 0                  | 0 | 0 | 0 | 0                      | 0  | 0 | 0 | 0                     | 1 | 0                    | 0 | 0 | 0 | 0                 | 0 | 0                    | 0  | 0                | 0 | 0 | 1                   | 2 |                       |  |
| D10                   | 1                    | 0  | 0                  | 0 | 0 | 0 | 0                      | 0  | 0 | 0 | 0                     | 0 | 0                    | 0 | 0 | 0 | 0                 | 0 | 0                    | 0  | 0                | 0 | 0 | 1                   | 0 |                       |  |
| D11                   | 0                    | 0  | 0                  | 0 | 0 | 0 | 0                      | 0  | 1 | 1 | 0                     | 0 | 0                    | 0 | 0 | 0 | 28                | 0 | 0                    | 0  | 0                | 0 | 0 | 1                   | 0 |                       |  |
| D12                   | 0                    | 0  | 0                  | 0 | 0 | 0 | 0                      | 0  | 3 | 3 | 0                     | 0 | 0                    | 0 | 0 | 0 | 0                 | 0 | 0                    | 0  | 0                | 0 | 0 | 0                   | 0 |                       |  |
| D13                   | 0                    | 0  | 0                  | 1 | 0 | 0 | 159                    | 1  | 0 | 0 | 0                     | 0 | 0                    | 0 | 0 | 0 | 28                | 0 | 0                    | 1  | 0                | 0 | 0 | 0                   | 2 |                       |  |
| D14                   | 0                    | 0  | 0                  | 0 | 0 | 0 | 0                      | 0  | 1 | 0 | 0                     | 0 | 0                    | 0 | 0 | 0 | 0                 | 0 | 0                    | 1  | 0                | 0 | 0 | 0                   | 0 |                       |  |
| D15                   | 2                    | 1  | 0                  | 0 | 0 | 0 | 0                      | 1  | 2 | 2 | 0                     | 0 | 0                    | 0 | 0 | 0 | 0                 | 0 | 0                    | 1  | 0                | 0 | 0 | 0                   | 0 |                       |  |
| FD1                   | 0                    | 0  | 0                  | 0 | 0 | 0 | 0                      | 0  | 0 | 0 | 0                     | 0 | 0                    | 0 | 0 | 0 | 1                 | 0 | 0                    | 0  | 0                | 0 | 0 | 0                   | 0 |                       |  |
| FD2                   | 0                    | 0  | 0                  | 0 | 0 | 0 | 0                      | 5  | 0 | 0 | 0                     | 0 | 0                    | 0 | 0 | 0 | 0                 | 0 | 0                    | 0  | 0                | 0 | 0 | 0                   | 0 |                       |  |
| FD3                   | 1                    | 0  | 0                  | 0 | 0 | 0 | 0                      | 0  | 0 | 0 | 0                     | 0 | 0                    | 0 | 0 | 0 | 0                 | 0 | 0                    | 0  | 0                | 0 | 0 | 1                   | 0 |                       |  |
| FD4                   | 0                    | 0  | 0                  | 0 | 0 | 0 | 0                      | 0  | 3 | 4 | 0                     | 0 | 0                    | 0 | 0 | 0 | 0                 | 0 | 0                    | 0  | 0                | 0 | 0 | 0                   | 0 |                       |  |
| FD5                   | 3                    | 4  | 0                  | 0 | 0 | 0 | 0                      | 0  | 0 | 0 | 0                     | 0 | 0                    | 0 | 0 | 0 | 0                 | 0 | 46                   | 0  | 0                | 0 | 0 | 0                   | 0 |                       |  |
| FD6                   | 0                    | 0  | 0                  | 1 | 0 | 1 | 18                     | 5  | 0 | 0 | 2                     | 0 | 0                    | 0 | 0 | 0 | 1                 | 0 | 0                    | 2  | 1                | 0 | 0 | 0                   | 1 |                       |  |
| FD7                   | 9                    | 11 | 0                  | 0 | 0 | 0 | 0                      | 1  | 1 | 0 | 0                     | 0 | 0                    | 0 | 0 | 0 | 0                 | 0 | 0                    | 0  | 0                | 0 | 0 | 0                   | 0 |                       |  |
| FD8                   | 0                    | 0  | 0                  | 0 | 0 | 0 | 31                     | 68 | 2 | 2 | 0                     | 0 | 0                    | 0 | 0 | 0 | 0                 | 0 | 0                    | 0  | 0                | 0 | 0 | 0                   | 0 |                       |  |
| FD9                   | 0                    | 0  | 0                  | 0 | 0 | 0 | 0                      | 1  | 0 | 1 | 0                     | 0 | 0                    | 0 | 0 | 0 | 0                 | 0 | 0                    | 0  | 0                | 0 | 0 | 0                   | 0 |                       |  |
| FD10                  | 0                    | 0  | 0                  | 0 | 0 | 0 | 0                      | 0  | 0 | 0 | 0                     | 0 | 0                    | 0 | 1 | 0 | 0                 | 0 | 0                    | 0  | 0                | 0 | 0 | 0                   | 0 |                       |  |
| FD12                  | 0                    | 0  | 0                  | 0 | 0 | 0 | 0                      | 0  | 1 | 0 | 0                     | 0 | 0                    | 0 | 0 | 0 | 0                 | 0 | 0                    | 0  | 0                | 0 | 0 | 0                   | 0 |                       |  |
| FD13                  | 0                    | 0  | 0                  | 0 | 0 | 0 | 0                      | 1  | 0 | 0 | 0                     | 0 | 0                    | 0 | 0 | 0 | 0                 | 0 | 0                    | 0  | 0                | 0 | 0 | 0                   | 0 |                       |  |

| Transect <sup>1</sup> | <i>D. marginatus</i> |   | <i>H. punctata</i> |    |    |    | <i>Hy. lusitanicum</i> |    |     |     | <i>Hy. marginatum</i> |   | <i>I. acuminatus</i> |   |   |    | <i>I. ricinus</i> |    | <i>Rh. annulatus</i> |    | <i>Rh. bursa</i> |   |   | <i>Rh. pusillus</i> |   | <i>Rh. sanguineus</i> |  |
|-----------------------|----------------------|---|--------------------|----|----|----|------------------------|----|-----|-----|-----------------------|---|----------------------|---|---|----|-------------------|----|----------------------|----|------------------|---|---|---------------------|---|-----------------------|--|
|                       | M                    | F | L                  | N  | M  | F  | L                      | N  | M   | F   | L                     | F | M                    | N | M | F  | L                 | N  | L                    | M  | F                | M | F | M                   | F |                       |  |
| A1                    | 0                    | 1 | 0                  | 0  | 0  | 0  | 0                      | 17 | 30  | 19  | 0                     | 0 | 0                    | 0 | 0 | 0  | 0                 | 0  | 0                    | 0  | 0                | 2 | 6 | 0                   | 0 |                       |  |
| A2                    | 1                    | 0 | 0                  | 2  | 0  | 0  | 0                      | 10 | 13  | 11  | 0                     | 0 | 0                    | 0 | 1 | 1  | 0                 | 0  | 26                   | 3  | 1                | 0 | 0 | 0                   | 0 |                       |  |
| A3                    | 0                    | 0 | 0                  | 0  | 0  | 0  | 0                      | 0  | 0   | 0   | 0                     | 0 | 0                    | 0 | 0 | 0  | 0                 | 0  | 0                    | 0  | 0                | 0 | 0 | 0                   | 0 |                       |  |
| A4                    | 0                    | 0 | 0                  | 0  | 0  | 0  | 0                      | 0  | 0   | 0   | 0                     | 0 | 0                    | 0 | 0 | 0  | 0                 | 0  | 0                    | 0  | 0                | 0 | 0 | 1                   | 0 |                       |  |
| A5                    | 0                    | 1 | 0                  | 0  | 0  | 0  | 2                      | 0  | 0   | 0   | 0                     | 0 | 1                    | 0 | 0 | 0  | 0                 | 0  | 21                   | 0  | 0                | 0 | 0 | 4                   | 3 |                       |  |
| A6                    | 0                    | 1 | 0                  | 0  | 0  | 0  | 31                     | 9  | 10  | 3   | 0                     | 0 | 0                    | 0 | 1 | 0  | 0                 | 1  | 2                    | 1  | 0                | 0 | 3 | 4                   |   |                       |  |
| A7                    | 0                    | 0 | 143                | 0  | 1  | 1  | 22                     | 1  | 0   | 0   | 0                     | 0 | 0                    | 1 | 0 | 0  | 0                 | 0  | 0                    | 0  | 0                | 0 | 1 | 0                   |   |                       |  |
| A8                    | 0                    | 0 | 176                | 3  | 1  | 0  | 2                      | 5  | 2   | 1   | 0                     | 0 | 0                    | 0 | 0 | 0  | 0                 | 2  | 5                    | 3  | 0                | 0 | 1 | 1                   |   |                       |  |
| A9                    | 0                    | 0 | 0                  | 0  | 1  | 0  | 213                    | 4  | 0   | 1   | 0                     | 0 | 0                    | 0 | 0 | 4  | 0                 | 28 | 1                    | 1  | 0                | 1 | 0 | 0                   |   |                       |  |
| A10                   | 0                    | 0 | 0                  | 0  | 0  | 0  | 0                      | 0  | 0   | 0   | 0                     | 0 | 0                    | 0 | 0 | 0  | 0                 | 0  | 0                    | 0  | 0                | 0 | 0 | 0                   |   |                       |  |
| A11                   | 0                    | 0 | 0                  | 0  | 0  | 0  | 63                     | 2  | 1   | 0   | 0                     | 0 | 0                    | 0 | 0 | 3  | 0                 | 4  | 0                    | 0  | 0                | 0 | 3 | 4                   |   |                       |  |
| A12                   | 0                    | 0 | 0                  | 0  | 0  | 0  | 0                      | 0  | 0   | 0   | 0                     | 0 | 0                    | 0 | 0 | 0  | 0                 | 0  | 0                    | 0  | 0                | 0 | 0 | 0                   |   |                       |  |
| A13                   | 0                    | 0 | 0                  | 0  | 0  | 0  | 236                    | 6  | 0   | 1   | 0                     | 0 | 0                    | 0 | 0 | 0  | 0                 | 0  | 5                    | 11 | 0                | 0 | 0 | 1                   |   |                       |  |
| A14                   | 0                    | 0 | 0                  | 0  | 0  | 0  | 152                    | 20 | 6   | 5   | 0                     | 0 | 0                    | 0 | 0 | 0  | 0                 | 32 | 1                    | 4  | 0                | 0 | 1 | 3                   |   |                       |  |
| A15                   | 0                    | 0 | 0                  | 1  | 0  | 0  | 0                      | 1  | 0   | 0   | 0                     | 0 | 0                    | 0 | 0 | 0  | 0                 | 0  | 0                    | 0  | 0                | 0 | 0 | 0                   |   |                       |  |
| A16                   | 0                    | 0 | 0                  | 49 | 26 | 17 | 1223                   | 37 | 280 | 258 | 0                     | 0 | 0                    | 0 | 1 | 0  | 0                 | 0  | 0                    | 0  | 0                | 0 | 0 | 0                   |   |                       |  |
| FA5                   | 0                    | 0 | 0                  | 0  | 0  | 0  | 0                      | 0  | 0   | 0   | 0                     | 0 | 0                    | 0 | 0 | 0  | 0                 | 6  | 1                    | 0  | 0                | 0 | 0 | 2                   |   |                       |  |
| FA6                   | 0                    | 0 | 0                  | 0  | 1  | 0  | 0                      | 0  | 1   | 5   | 0                     | 0 | 0                    | 0 | 0 | 0  | 0                 | 2  | 0                    | 0  | 0                | 0 | 0 | 0                   |   |                       |  |
| FA7                   | 0                    | 0 | 0                  | 0  | 0  | 0  | 0                      | 0  | 0   | 0   | 0                     | 0 | 0                    | 0 | 0 | 0  | 0                 | 0  | 0                    | 0  | 0                | 0 | 0 | 0                   |   |                       |  |
| FA8                   | 0                    | 0 | 0                  | 0  | 0  | 0  | 33                     | 0  | 0   | 0   | 0                     | 0 | 0                    | 0 | 0 | 0  | 0                 | 0  | 2                    | 1  | 0                | 0 | 0 | 0                   |   |                       |  |
| FA9                   | 0                    | 0 | 0                  | 0  | 1  | 0  | 0                      | 53 | 0   | 0   | 0                     | 0 | 0                    | 0 | 0 | 0  | 0                 | 37 | 0                    | 0  | 0                | 0 | 0 | 0                   |   |                       |  |
| FA11                  | 0                    | 0 | 0                  | 0  | 0  | 0  | 0                      | 2  | 0   | 0   | 0                     | 0 | 0                    | 0 | 0 | 3  | 0                 | 8  | 0                    | 0  | 0                | 0 | 0 | 0                   |   |                       |  |
| FA13                  | 0                    | 0 | 0                  | 0  | 0  | 0  | 0                      | 0  | 0   | 0   | 0                     | 0 | 0                    | 0 | 0 | 0  | 0                 | 60 | 0                    | 0  | 0                | 0 | 0 | 0                   |   |                       |  |
| FA14                  | 0                    | 0 | 0                  | 0  | 0  | 0  | 15                     | 14 | 0   | 0   | 0                     | 0 | 0                    | 0 | 0 | 91 | 0                 | 0  | 9                    | 8  | 0                | 0 | 0 | 0                   |   |                       |  |

<sup>1</sup>D1-D15: Transects in the Natural Protected Area of Doñana; FD: Buffer areas in the NPAD; A1-A16: Transects in the Natural Protected Area of Los Alcornocales; FA: Buffer areas in the NPAA; *D.*: *Dermacentor*; *H.*: *Haemaphysalis*; *Hy.*: *Hyalomma*; *I.*: *Ixodes*; *Rh.*: *Rhipicephalus*; L: Larvae; N: Nymph; M: male; F: Female

**Supplementary table 5.** Number of ticks captured in each transect in April 2018 in the Natural Protected Areas of Doñana and Los Alcornocales.

| Transect1 | D. marginatus |   | H. punctata |   |   |   | Hy. lusitanicum |   |   |    | Hy. marginatum |   | I. acuminatus | I. ricinus |   |   |   | Rh. annulatus |   | Rh. bursa |   |   | Rh. pusillus |   | Rh. sanguineus |   |
|-----------|---------------|---|-------------|---|---|---|-----------------|---|---|----|----------------|---|---------------|------------|---|---|---|---------------|---|-----------|---|---|--------------|---|----------------|---|
|           | M             | F | L           | N | M | F | L               | N | M | F  | L              | F | M             | N          | M | F | L | N             | L | M         | F | M | F            | M | F              |   |
| D1        |               |   |             |   |   |   |                 |   |   |    | 1              |   |               |            |   |   |   |               |   |           |   |   |              |   | 1              | 1 |
| D2        |               |   |             |   |   |   |                 |   |   |    |                |   |               |            |   |   |   |               |   |           |   |   |              |   |                |   |
| D3        | 2             | 4 |             |   |   |   |                 |   |   |    |                |   |               |            |   |   |   |               |   |           |   |   |              |   | 1              | 2 |
| D4        |               |   |             |   |   |   |                 |   |   | 1  | 1              |   |               |            |   |   |   |               |   |           |   |   |              |   |                |   |
| D5        |               | 1 |             |   |   |   |                 |   |   | 1  |                |   |               |            |   |   |   |               |   |           |   |   |              |   | 1              |   |
| D6        |               |   |             |   |   |   |                 |   |   |    |                |   |               |            |   |   |   |               |   |           |   |   |              |   |                |   |
| D7        |               |   |             |   |   |   |                 |   |   |    |                |   |               |            |   |   |   |               |   |           |   |   |              |   |                |   |
| D8        |               |   |             |   |   |   |                 |   |   |    |                |   |               |            |   |   |   |               |   |           |   |   |              |   |                |   |
| D9        |               |   |             |   |   |   |                 |   |   |    |                |   |               |            |   | 1 |   |               |   |           |   |   |              |   |                | 1 |
| D10       | 1             |   |             |   |   |   |                 |   |   |    |                |   |               |            |   |   |   |               |   |           |   |   |              |   | 1              |   |
| D11       |               |   |             |   |   |   |                 |   |   |    |                |   |               |            |   |   |   |               |   |           |   |   |              |   |                |   |
| D12       |               |   |             |   |   |   |                 |   |   | 2  | 2              |   |               |            |   |   |   |               |   |           |   |   |              |   |                |   |
| D13       |               |   |             |   |   |   |                 |   |   |    |                |   |               |            |   |   |   |               |   |           |   |   |              |   |                | 2 |
| D14       |               |   |             |   |   |   |                 |   |   |    |                |   |               |            |   |   |   |               |   |           |   |   |              |   |                |   |
| D15       |               |   |             |   |   |   |                 |   |   |    |                |   |               |            |   |   |   |               |   |           |   |   |              |   |                |   |
| A1        |               |   |             |   |   |   |                 |   |   | 14 | 7              |   |               |            |   |   |   |               |   |           |   |   |              | 5 |                |   |
| A2        |               |   |             |   |   |   |                 |   |   |    |                |   |               |            |   |   |   |               |   |           |   |   |              |   |                |   |
| A3        |               |   |             |   |   |   |                 |   |   |    |                |   |               |            |   |   |   |               |   |           |   |   |              |   |                |   |
| A4        |               |   |             |   |   |   |                 |   |   |    |                |   |               |            |   |   |   |               |   |           |   |   |              |   |                |   |
| A5        |               | 1 |             |   |   |   |                 |   |   |    |                |   |               |            |   |   |   |               |   |           |   |   |              |   |                |   |
| A6        |               |   |             |   |   |   |                 |   |   |    |                |   |               |            |   |   |   |               |   |           |   |   |              |   | 2              | 2 |
| A7        |               |   |             |   | 1 | 1 |                 |   |   |    |                |   |               |            | 1 |   |   |               |   |           |   |   |              |   | 1              |   |
| A8        |               |   |             |   | 1 |   |                 |   |   |    |                |   |               |            |   |   |   |               |   |           |   |   |              |   |                |   |
| A9        |               |   |             |   |   |   |                 |   |   |    |                |   |               |            |   |   |   |               |   |           |   |   |              |   |                |   |
| A10       |               |   |             |   |   |   |                 |   |   |    |                |   |               |            |   |   |   |               |   |           |   |   |              |   |                |   |
| A11       |               |   |             |   |   |   |                 |   |   |    |                |   |               |            |   |   |   |               |   |           |   |   |              |   |                |   |
| A12       |               |   |             |   |   |   |                 |   |   |    |                |   |               |            |   |   |   |               |   |           |   |   |              |   |                |   |
| A13       |               |   |             |   |   |   |                 |   |   |    |                |   |               |            |   |   |   |               |   |           |   |   |              |   |                |   |
| A14       |               |   |             |   |   |   |                 |   |   |    |                |   |               |            |   |   |   |               |   |           |   |   |              |   |                |   |

<sup>1</sup>D1-D15: Transects in the Natural Protected Area of Doñana; A1-A16: Transects in the Natural Protected Area of Los Alcornocales ; *D.*: *Dermacentor*; *H.*: *Haemaphysalis*; *Hy.*: *Hyalomma*; *I.*: *Ixodes*; *Rh.*: *Rhipicephalus*; L: Larvae; N: Nymph; M: male; F: Female

**Supplementary table 6.** Number of ticks captured in each transect in May 2018 in the Natural Protected Area of Doñana and in June in the Natural Protected Area of Los Alcornocales.

| Transect <sup>1</sup> | <i>D. marginatus</i> |   | <i>H. punctata</i> |   |   |   | <i>Hy. lusitanicum</i> |   |   |    | <i>Hy. marginatum</i> |   | <i>I. acuminatus</i> |   |   | <i>I. ricinus</i> |    |   | <i>Rh. annulatus</i> |   | <i>Rh. bursa</i> |   |   | <i>Rh. pusillus</i> |   | <i>Rh. sanguineus</i> |  |
|-----------------------|----------------------|---|--------------------|---|---|---|------------------------|---|---|----|-----------------------|---|----------------------|---|---|-------------------|----|---|----------------------|---|------------------|---|---|---------------------|---|-----------------------|--|
|                       | M                    | F | L                  | N | M | F | L                      | N | M | F  | L                     | F | M                    | N | M | F                 | L  | N | L                    | M | F                | M | F | M                   | F |                       |  |
| D1                    |                      |   |                    |   |   |   |                        |   |   |    |                       |   |                      |   |   |                   |    |   |                      |   |                  |   |   |                     |   |                       |  |
| D2                    |                      |   |                    |   |   |   |                        |   |   |    | 1                     |   |                      |   |   |                   |    |   |                      |   |                  |   |   |                     |   |                       |  |
| D3                    | 2                    | 2 |                    |   |   |   |                        |   |   |    | 1                     |   |                      |   |   |                   |    |   |                      |   |                  |   |   |                     |   | 1                     |  |
| D4                    |                      |   |                    |   |   |   |                        |   |   | 4  | 3                     |   |                      |   |   |                   |    |   |                      |   |                  |   |   | 1                   | 1 |                       |  |
| D5                    |                      |   |                    |   |   |   |                        |   |   | 2  |                       |   |                      |   |   |                   |    |   |                      | 3 | 2                | 1 |   | 1                   | 1 |                       |  |
| D6                    |                      |   |                    |   |   |   |                        |   |   |    |                       |   |                      |   |   |                   |    |   |                      |   | 1                |   |   | 2                   |   |                       |  |
| D7                    |                      |   |                    |   |   |   |                        |   |   | 5  | 4                     |   |                      |   |   |                   |    |   |                      |   | 1                |   |   |                     |   |                       |  |
| D8                    |                      |   |                    |   |   |   |                        |   |   | 2  | 1                     |   |                      |   |   |                   | 29 |   |                      |   |                  |   |   |                     |   |                       |  |
| D9                    |                      |   |                    |   |   |   |                        |   |   |    |                       |   |                      |   |   |                   |    |   |                      |   |                  |   |   |                     |   | 2                     |  |
| D10                   |                      |   |                    |   |   |   |                        |   |   |    |                       |   |                      |   |   |                   |    |   |                      |   |                  |   |   |                     |   |                       |  |
| D11                   |                      |   |                    |   |   |   |                        |   |   | 1  | 1                     |   |                      |   |   |                   |    |   |                      |   |                  |   |   | 1                   |   |                       |  |
| D12                   |                      |   |                    |   |   |   |                        |   |   | 1  | 1                     |   |                      |   |   |                   |    |   |                      |   |                  |   |   |                     |   |                       |  |
| D13                   |                      |   |                    |   |   |   |                        |   |   |    |                       |   |                      |   |   |                   |    |   |                      |   | 1                |   |   |                     |   |                       |  |
| D14                   |                      |   |                    |   |   |   |                        |   |   | 1  |                       |   |                      |   |   |                   |    |   |                      |   | 1                |   |   |                     |   |                       |  |
| D15                   |                      |   |                    |   |   |   |                        |   |   |    | 1                     |   |                      |   |   |                   |    |   |                      |   | 1                |   |   |                     |   |                       |  |
| A1                    |                      |   |                    |   |   |   |                        |   |   | 6  | 3                     |   |                      |   |   |                   |    |   |                      |   |                  | 1 |   |                     |   |                       |  |
| A2                    |                      |   |                    |   |   |   |                        |   |   | 12 | 9                     |   |                      |   |   |                   |    |   |                      |   |                  |   |   |                     |   |                       |  |
| A4                    |                      |   |                    |   |   |   |                        |   |   |    |                       |   |                      |   |   |                   |    |   |                      |   |                  |   |   |                     | 1 |                       |  |
| A5                    |                      |   |                    |   |   |   |                        |   |   |    |                       |   |                      |   |   |                   |    |   |                      |   |                  |   |   | 4                   | 3 |                       |  |
| A6                    |                      |   |                    |   |   |   |                        |   |   | 8  | 3                     |   |                      |   |   |                   |    |   |                      |   |                  |   |   | 1                   | 1 |                       |  |
| A7                    |                      |   | 143                |   |   |   |                        |   |   |    |                       |   |                      |   |   |                   |    |   |                      |   |                  |   |   |                     |   |                       |  |
| A8                    |                      |   | 169                |   |   |   | 1                      |   | 2 | 1  |                       |   |                      | 1 |   |                   |    |   |                      | 3 |                  |   |   | 1                   | 1 |                       |  |
| A9                    |                      |   |                    |   |   |   |                        |   |   |    | 1                     |   |                      |   |   |                   |    |   |                      |   | 1                |   |   | 1                   |   |                       |  |
| A11                   |                      |   |                    |   |   |   |                        |   | 1 |    |                       |   |                      |   |   |                   |    |   |                      |   |                  |   |   | 3                   | 4 |                       |  |
| A12                   |                      |   |                    |   |   |   |                        |   |   |    |                       |   |                      |   |   |                   |    |   |                      |   |                  |   |   |                     |   |                       |  |
| A13                   |                      |   |                    |   |   |   |                        |   |   |    |                       |   |                      |   |   |                   |    |   |                      | 1 | 2                |   |   |                     |   | 1                     |  |

<sup>1</sup>D1-D15: Transects in the Natural Protected Area of Doñana; A1-A16: Transects in the Natural Protected Area of Los Alcornocales; *D.*: *Dermacentor*; *H.*: *Haemaphysalis*; *Hy.*: *Hyalomma*; *I.*: *Ixodes*; *Rh.*: *Rhipicephalus*; L: Larvae; N: Nymph; M: male; F: Female

**Supplementary table 7.** Number of ticks captured in each transect in August 2018 in the Natural Protected Areas of Doñana and Los Alcornocales.

| Transect <sup>1</sup> | <i>D. marginatus</i> |   | <i>H. punctata</i> |   |   |   | <i>Hy. lusitanicum</i> |    |     |     | <i>Hy. marginatum</i> |   | <i>I. acuminatus</i> |   |   |   | <i>I. ricinus</i> |   | <i>Rh. annulatus</i> |   | <i>Rh. bursa</i> |   |   | <i>Rh. pusillus</i> |   | <i>Rh. sanguineus</i> |  |
|-----------------------|----------------------|---|--------------------|---|---|---|------------------------|----|-----|-----|-----------------------|---|----------------------|---|---|---|-------------------|---|----------------------|---|------------------|---|---|---------------------|---|-----------------------|--|
|                       | M                    | F | L                  | N | M | F | L                      | N  | M   | F   | L                     | F | M                    | N | M | F | L                 | N | L                    | M | F                | M | F | M                   | F |                       |  |
| D1                    |                      |   |                    |   |   |   |                        |    |     |     |                       |   |                      |   |   |   | 22                |   |                      |   |                  |   |   |                     | 1 | 1                     |  |
| D2                    |                      |   |                    |   |   |   |                        | 2  |     |     |                       |   |                      |   |   |   | 1                 |   |                      |   |                  |   |   |                     |   |                       |  |
| D3                    |                      |   |                    |   |   |   |                        |    |     |     |                       |   |                      |   |   |   |                   |   |                      |   |                  |   |   |                     | 1 | 4                     |  |
| D4                    |                      |   |                    |   |   |   |                        | 3  |     | 3   |                       |   |                      |   |   |   |                   |   |                      |   |                  |   |   |                     | 1 | 1                     |  |
| D5                    |                      |   |                    | 6 |   |   | 21                     | 11 |     |     |                       |   |                      |   |   |   |                   |   |                      | 2 |                  |   |   |                     | 3 | 1                     |  |
| D6                    |                      |   |                    | 1 |   |   |                        | 3  |     |     |                       |   |                      |   |   |   |                   |   | 11                   | 3 |                  |   |   |                     | 2 |                       |  |
| D7                    |                      |   |                    |   |   |   |                        |    |     |     |                       |   |                      |   |   |   |                   |   |                      |   |                  |   | 1 |                     |   |                       |  |
| D8                    |                      |   |                    |   |   |   | 142                    | 39 | 1   | 3   |                       |   |                      |   |   |   |                   | 1 |                      |   |                  |   |   |                     |   |                       |  |
| D9                    |                      |   |                    |   |   |   |                        |    |     |     |                       |   |                      |   |   |   |                   |   |                      |   |                  |   |   |                     | 1 | 2                     |  |
| D10                   |                      |   |                    |   |   |   |                        |    |     |     |                       |   |                      |   |   |   |                   |   |                      |   |                  |   |   |                     | 1 |                       |  |
| D11                   |                      |   |                    |   |   |   |                        |    |     |     |                       |   |                      |   |   |   | 28                |   |                      |   |                  |   |   |                     | 1 |                       |  |
| D12                   |                      |   |                    |   |   |   |                        |    |     |     |                       |   |                      |   |   |   |                   |   |                      |   |                  |   |   |                     |   |                       |  |
| D13                   |                      |   |                    | 1 |   |   | 159                    | 1  |     |     |                       |   |                      |   |   |   | 20                |   |                      |   |                  |   |   |                     |   | 2                     |  |
| D15                   |                      |   |                    |   |   |   |                        |    | 2   | 1   |                       |   |                      |   |   |   |                   |   |                      |   |                  |   |   |                     |   |                       |  |
| FD4                   |                      |   |                    |   |   |   |                        |    |     |     |                       |   |                      |   |   |   |                   |   |                      |   |                  |   |   |                     |   |                       |  |
| FD6                   |                      |   |                    | 1 |   |   | 18                     | 4  |     |     |                       |   |                      |   |   |   |                   |   |                      | 2 | 1                |   |   |                     |   |                       |  |
| FD8                   |                      |   |                    |   |   |   | 31                     | 67 | 2   | 2   |                       |   |                      |   |   |   |                   |   |                      |   |                  |   |   |                     | 1 |                       |  |
| A1                    |                      |   |                    |   |   |   |                        | 17 | 7   | 7   |                       |   |                      |   |   |   |                   |   |                      |   |                  | 1 | 1 |                     |   |                       |  |
| A2                    |                      |   |                    | 1 |   |   |                        | 7  |     | 1   |                       |   |                      |   |   |   |                   |   |                      | 3 |                  |   |   |                     |   |                       |  |
| A5                    |                      |   |                    |   |   |   |                        |    |     |     |                       |   |                      |   |   |   |                   |   |                      |   |                  |   |   |                     |   | 1                     |  |
| A6                    |                      |   |                    |   |   |   |                        |    | 1   |     |                       |   |                      |   |   |   |                   |   |                      | 2 | 1                |   |   |                     |   |                       |  |
| A7                    |                      |   |                    |   |   |   | 22                     |    |     |     |                       |   |                      |   |   |   |                   |   |                      |   |                  |   |   |                     |   |                       |  |
| A8                    |                      |   | 7                  | 3 |   |   |                        | 2  |     |     |                       |   |                      |   |   |   |                   |   | 2                    | 2 | 3                |   |   |                     |   |                       |  |
| A9                    |                      |   |                    |   |   |   | 213                    |    |     |     |                       |   |                      |   |   |   |                   |   |                      | 1 |                  |   |   |                     |   |                       |  |
| A11                   |                      |   |                    |   |   |   | 62                     | 1  |     |     |                       |   |                      |   |   |   |                   |   |                      |   |                  |   |   |                     |   |                       |  |
| A13                   |                      |   |                    |   |   |   | 236                    |    |     | 1   |                       |   |                      |   |   |   |                   |   |                      | 4 | 9                |   |   |                     |   |                       |  |
| A14                   |                      |   |                    |   |   |   | 152                    |    |     |     |                       |   |                      |   |   |   |                   |   |                      |   | 2                |   |   |                     |   |                       |  |
| A16                   |                      |   |                    |   |   |   | 1067                   | 8  | 134 | 147 |                       |   |                      |   |   |   |                   |   |                      |   |                  |   |   |                     |   |                       |  |
| FA5                   |                      |   |                    |   |   |   |                        |    |     |     |                       |   |                      |   |   |   |                   |   |                      | 1 |                  |   |   |                     |   |                       |  |

| Transect <sup>1</sup> | <i>D. marginatus</i> |   | <i>H. punctata</i> |   |   |   | <i>Hy. lusitanicum</i> |   |   |   | <i>Hy. marginatum</i> |   | <i>I. acuminatus</i> |   |   | <i>I. ricinus</i> |   |   | <i>Rh. annulatus</i> |   | <i>Rh. bursa</i> |   |   | <i>Rh. pusillus</i> |   | <i>Rh. sanguineus</i> |  |
|-----------------------|----------------------|---|--------------------|---|---|---|------------------------|---|---|---|-----------------------|---|----------------------|---|---|-------------------|---|---|----------------------|---|------------------|---|---|---------------------|---|-----------------------|--|
|                       | M                    | F | L                  | N | M | F | L                      | N | M | F | L                     | F | M                    | N | M | F                 | L | N | L                    | M | F                | M | F | M                   | F |                       |  |
| FA6                   |                      |   |                    |   |   |   |                        |   | 1 | 5 |                       |   |                      |   |   |                   |   |   |                      |   |                  |   |   | 1                   |   |                       |  |
| FA8                   |                      |   |                    |   |   |   | 33                     |   |   |   |                       |   |                      |   |   |                   |   |   |                      | 2 | 1                |   |   | 4                   | 3 |                       |  |
| FA9                   |                      |   |                    |   |   |   |                        |   |   |   |                       |   |                      |   |   |                   |   |   |                      |   |                  |   |   | 3                   | 4 |                       |  |
| FA14                  |                      |   |                    |   |   |   | 15                     |   |   |   |                       |   |                      |   |   |                   |   |   |                      | 9 | 8                |   |   | 1                   |   |                       |  |

<sup>1</sup>D1-D15: Transects in the Natural Protected Area of Doñana; FD: Buffer areas in Doñana; A1-A16: Transects in the Natural Protected Area of Los Alcornocales; FA: Buffer areas in Alcornocales

*D.*: *Dermacentor*; *H.*: *Haemaphysalis*; *Hy.*: *Hyalomma*; *I.*: *Ixodes*; *Rh.*: *Rhipicephalus*; L: Larvae; N: Nymph; M: male; F: Female

**Supplementary table 8.** Number of ticks captured in each transect in October 2018 in the Natural Protected Areas of Doñana and Los Alcornocales.

| Transect <sup>1</sup> | <i>D. marginatus</i> |   | <i>H. punctata</i> |   |   |   | <i>Hy. lusitanicum</i> |    |   |   | <i>Hy. marginatum</i> |   | <i>I. acuminatus</i> | <i>I. ricinus</i> |   |   |    | <i>Rh. annulatus</i> |   | <i>Rh. bursa</i> |   |   | <i>Rh. pusillus</i> |   | <i>Rh. sanguineus</i> |   |
|-----------------------|----------------------|---|--------------------|---|---|---|------------------------|----|---|---|-----------------------|---|----------------------|-------------------|---|---|----|----------------------|---|------------------|---|---|---------------------|---|-----------------------|---|
|                       | M                    | F | L                  | N | M | F | L                      | N  | M | F | L                     | F | M                    | N                 | M | F | L  | N                    | L | M                | F | M | F                   | M | F                     |   |
| D1                    |                      |   |                    |   |   |   |                        |    |   |   |                       |   |                      |                   |   |   |    |                      |   |                  |   |   |                     |   | 1                     | 1 |
| D2                    |                      |   |                    |   |   |   |                        |    |   |   |                       |   |                      |                   |   |   |    |                      |   |                  |   |   |                     |   | 0                     | 0 |
| D3                    |                      |   |                    |   |   |   |                        |    |   |   |                       |   |                      |                   |   |   |    |                      |   |                  |   |   |                     |   | 1                     | 4 |
| D4                    |                      |   |                    |   |   |   |                        | 41 |   | 1 |                       |   |                      |                   |   |   |    |                      |   |                  |   |   |                     |   | 1                     | 1 |
| D5                    |                      |   |                    |   |   |   |                        |    |   |   | 33                    |   |                      |                   |   |   |    |                      |   |                  |   |   |                     |   | 3                     | 1 |
| D6                    |                      |   |                    |   |   |   |                        |    |   |   |                       |   |                      |                   |   |   | 74 |                      |   |                  |   |   |                     |   | 2                     | 0 |
| D7                    |                      |   |                    |   |   |   |                        |    |   |   |                       |   |                      |                   |   |   |    |                      |   |                  |   |   |                     |   | 0                     | 0 |
| D8                    |                      |   |                    |   |   |   |                        |    | 1 |   |                       |   |                      |                   |   |   |    |                      |   |                  |   |   |                     |   | 0                     | 0 |
| D9                    |                      |   |                    |   |   |   |                        |    |   |   |                       |   |                      |                   |   |   |    |                      |   |                  |   |   |                     |   | 1                     | 2 |
| D10                   |                      |   |                    |   |   |   |                        |    |   |   |                       |   |                      |                   |   |   |    |                      |   |                  |   |   |                     |   | 1                     | 0 |
| D11                   |                      |   |                    |   |   |   |                        |    |   |   |                       |   |                      |                   |   |   |    |                      |   |                  |   |   |                     |   | 1                     | 0 |
| D12                   |                      |   |                    |   |   |   |                        |    |   |   |                       |   |                      |                   |   |   |    |                      |   |                  |   |   |                     |   | 0                     | 0 |
| D13                   |                      |   |                    |   |   |   |                        |    |   |   |                       |   |                      |                   |   |   |    |                      |   |                  |   |   |                     |   | 0                     | 2 |
| D15                   |                      |   |                    |   |   |   |                        | 1  |   |   |                       |   |                      |                   |   |   |    |                      |   |                  |   |   |                     |   | 0                     | 0 |
| FD1                   |                      |   |                    |   |   |   |                        |    |   |   |                       |   |                      |                   |   |   | 1  |                      |   |                  |   |   |                     |   | 0                     | 0 |
| FD2                   |                      |   |                    |   |   |   |                        | 5  |   |   |                       |   |                      |                   |   |   |    |                      |   |                  |   |   |                     |   | 0                     | 0 |
| FD4                   |                      |   |                    |   |   |   |                        |    | 3 | 2 |                       |   |                      |                   |   |   |    |                      |   |                  |   |   |                     |   | 0                     | 0 |
| FD6                   |                      |   |                    |   |   |   |                        | 1  |   |   | 2                     |   |                      |                   |   |   | 1  |                      |   |                  |   |   |                     |   | 1                     | 0 |
| FD7                   |                      |   |                    |   |   |   |                        | 1  |   |   |                       |   |                      |                   |   |   |    |                      |   |                  |   |   |                     |   | 0                     | 0 |
| FD8                   |                      |   |                    |   |   |   |                        | 1  |   |   |                       |   |                      |                   |   |   |    |                      |   |                  |   |   |                     |   | 0                     | 0 |
| FD9                   |                      |   |                    |   |   |   |                        | 1  |   | 1 |                       |   |                      |                   |   |   |    |                      |   |                  |   |   |                     |   | 0                     | 1 |
| FD12                  |                      |   |                    |   |   |   |                        |    | 1 |   |                       |   |                      |                   |   |   |    |                      |   |                  |   |   |                     |   | 0                     | 0 |
| FD13                  |                      |   |                    |   |   |   |                        | 1  |   |   |                       |   |                      |                   |   |   |    |                      |   |                  |   |   |                     |   | 0                     | 0 |
| A1                    |                      |   |                    |   |   |   |                        |    | 3 | 1 |                       |   |                      |                   |   |   |    |                      |   |                  |   |   |                     |   | 0                     | 0 |
| A2                    |                      |   |                    | 1 |   |   |                        | 3  |   | 1 |                       |   |                      |                   |   |   |    |                      |   |                  | 1 |   |                     |   | 0                     | 0 |
| A5                    |                      |   |                    |   |   |   | 2                      |    |   |   |                       |   |                      |                   |   |   |    |                      |   |                  |   |   |                     |   | 0                     | 0 |
| A6                    |                      |   |                    |   |   |   | 31                     | 9  |   |   |                       |   |                      |                   |   |   |    |                      |   |                  |   |   |                     |   | 0                     | 0 |
| A7                    |                      |   |                    |   |   |   |                        | 1  |   |   |                       |   |                      |                   |   |   |    |                      |   |                  |   |   |                     |   | 0                     | 0 |

| Transect <sup>1</sup> | <i>D. marginatus</i> |   | <i>H. punctata</i> |    |   |   | <i>Hy. lusitanicum</i> |    |     |    | <i>Hy. marginatum</i> |   | <i>I. acuminatus</i> | <i>I. ricinus</i> |   |   | <i>Rh. annulatus</i> |   | <i>Rh. bursa</i> |   |   | <i>Rh. pusillus</i> |   | <i>Rh. sanguineus</i> |   |
|-----------------------|----------------------|---|--------------------|----|---|---|------------------------|----|-----|----|-----------------------|---|----------------------|-------------------|---|---|----------------------|---|------------------|---|---|---------------------|---|-----------------------|---|
|                       | M                    | F | L                  | N  | M | F | L                      | N  | M   | F  | L                     | F | M                    | N                 | M | F | L                    | N | L                | M | F | M                   | F | M                     | F |
| A8                    |                      |   |                    |    |   |   | 1                      | 3  |     |    |                       |   |                      |                   |   |   |                      |   |                  |   |   |                     |   | 0                     | 0 |
| A9                    |                      |   |                    |    |   |   |                        | 4  |     |    |                       |   |                      |                   |   |   | 4                    |   |                  |   |   |                     |   | 0                     | 0 |
| A11                   |                      |   |                    |    |   |   | 1                      | 1  |     |    |                       |   |                      |                   |   |   | 3                    |   |                  |   |   |                     |   | 1                     | 0 |
| A13                   |                      |   |                    |    |   |   |                        | 6  |     |    |                       |   |                      |                   |   |   |                      |   |                  |   |   |                     |   | 4                     | 3 |
| A14                   |                      |   |                    |    |   |   |                        | 20 |     |    |                       |   |                      |                   |   |   |                      |   |                  |   |   |                     |   | 3                     | 4 |
| A15                   |                      |   |                    | 1  |   |   |                        | 1  |     |    |                       |   |                      |                   |   |   |                      |   |                  |   |   |                     |   | 1                     | 0 |
| A16                   |                      |   |                    | 10 |   |   | 156                    | 29 | 104 | 83 |                       |   |                      |                   |   |   |                      |   |                  |   |   |                     |   | 1                     | 1 |
| FA9                   |                      |   |                    |    |   |   |                        | 51 |     |    |                       |   |                      |                   |   |   |                      |   |                  |   |   |                     |   | 0                     | 0 |
| FA11                  |                      |   |                    |    |   |   |                        | 2  |     |    |                       |   |                      |                   |   |   | 3                    |   |                  |   |   |                     |   | 0                     | 0 |
| FA14                  |                      |   |                    |    |   |   |                        | 14 |     |    |                       |   |                      |                   |   |   | 91                   |   |                  |   |   |                     |   | 3                     | 4 |

<sup>1</sup>D1-D15: Transects in the Natural Protected Area of Doñana; FD: Buffer areas in Doñana; A1-A16: Transects in the Natural Protected Area of Los Alcornocales; FA: Buffer areas in Alcornocales; *D.*: *Dermacentor*; *H.*: *Haemaphysalis*; *Hy.*: *Hyalomma*; *I.*: *Ixodes*; *Rh.*: *Rhipicephalus*; L: Larvae; N: Nymph; M: male; F: Female

**Supplementary table 9.** Number of ticks captured in each transect in November 2018 in the Natural Protected Area of Doñana and in December 2018 in the Natural Protected Area of Los Alcornocales.

| Transect <sup>1</sup> | <i>D. marginatus</i> |   | <i>H. punctata</i> |   |   |   | <i>Hy. lusitanicum</i> |   |   |   | <i>Hy. marginatum</i> |   | <i>I. acuminatus</i> | <i>I. ricinus</i> |   |   | <i>Rh. annulatus</i> |   | <i>Rh. bursa</i> |   |   | <i>Rh. pusillus</i> |   | <i>Rh. sanguineus</i> |   |
|-----------------------|----------------------|---|--------------------|---|---|---|------------------------|---|---|---|-----------------------|---|----------------------|-------------------|---|---|----------------------|---|------------------|---|---|---------------------|---|-----------------------|---|
|                       | M                    | F | L                  | N | M | F | L                      | N | M | F | L                     | F | M                    | N                 | M | F | L                    | N | L                | M | F | M                   | F | M                     | F |
| D1                    |                      |   |                    |   |   |   |                        |   |   |   |                       |   |                      |                   |   |   |                      |   |                  |   |   |                     |   |                       |   |
| D2                    |                      |   |                    |   |   |   |                        |   |   |   |                       |   |                      |                   |   |   |                      |   |                  |   |   |                     |   |                       |   |
| D3                    |                      |   |                    |   |   |   |                        |   |   |   |                       |   |                      |                   |   |   |                      |   |                  |   |   |                     |   |                       |   |
| D4                    |                      | 1 |                    |   |   |   |                        |   |   |   |                       |   |                      |                   |   |   |                      |   |                  |   |   |                     |   |                       |   |
| D5                    |                      | 2 |                    |   |   | 1 |                        |   |   |   |                       |   |                      |                   |   |   |                      |   | 24               |   |   |                     |   |                       |   |
| D6                    |                      |   |                    |   |   |   |                        |   |   |   |                       |   |                      |                   |   |   |                      |   |                  |   |   |                     |   |                       |   |
| D7                    | 8                    | 9 |                    |   |   |   |                        |   |   |   |                       |   |                      |                   |   |   |                      |   |                  |   |   |                     |   |                       |   |
| D8                    |                      |   |                    |   |   |   |                        |   |   |   |                       |   |                      |                   |   |   |                      |   |                  |   |   |                     |   |                       |   |
| D9                    |                      |   |                    |   |   |   |                        |   |   |   |                       |   |                      |                   |   |   |                      |   |                  |   |   |                     |   |                       |   |
| D10                   |                      |   |                    |   |   |   |                        |   |   |   |                       |   |                      |                   |   |   |                      |   |                  |   |   |                     |   |                       |   |
| D11                   |                      |   |                    |   |   |   |                        |   |   |   |                       |   |                      |                   |   |   |                      |   |                  |   |   |                     |   |                       |   |
| D12                   |                      |   |                    |   |   |   |                        |   |   |   |                       |   |                      |                   |   |   |                      |   |                  |   |   |                     |   |                       |   |
| D13                   |                      |   |                    |   |   |   |                        |   |   |   |                       |   |                      |                   |   |   |                      |   |                  |   |   |                     |   |                       |   |
| D15                   | 2                    | 1 |                    |   |   |   |                        |   |   |   |                       |   |                      |                   |   |   |                      |   |                  |   |   |                     |   |                       |   |
| FD4                   |                      |   |                    |   |   |   |                        |   |   | 1 |                       |   |                      |                   |   |   |                      |   |                  |   |   |                     |   |                       |   |
| FD5                   |                      | 1 |                    |   |   |   |                        |   |   |   |                       |   |                      |                   |   |   |                      |   | 46               |   |   |                     |   |                       |   |
| FD6                   |                      |   |                    |   |   | 1 |                        |   |   |   |                       |   |                      |                   |   |   |                      |   |                  |   |   |                     |   |                       |   |
| FD7                   | 4                    | 6 |                    |   |   |   |                        |   |   |   |                       |   |                      |                   |   |   |                      |   |                  |   |   |                     |   |                       |   |
| A1                    |                      |   |                    |   |   |   |                        |   |   |   |                       |   |                      |                   |   |   |                      |   |                  |   |   |                     |   |                       |   |
| A2                    |                      |   |                    |   |   |   |                        |   |   |   |                       |   |                      |                   | 1 |   |                      |   | 26               |   |   |                     |   |                       |   |
| A5                    |                      |   |                    |   |   |   |                        |   |   |   |                       |   |                      |                   |   |   |                      |   | 7                |   |   |                     |   |                       |   |
| A6                    |                      |   |                    |   |   |   |                        |   |   |   |                       |   |                      |                   |   |   |                      |   |                  |   |   |                     |   |                       |   |
| A7                    |                      |   |                    |   |   |   |                        |   |   |   |                       |   |                      |                   |   |   |                      |   |                  |   |   |                     |   |                       |   |
| A8                    |                      |   |                    |   |   |   |                        |   |   |   |                       |   |                      |                   |   |   |                      |   |                  |   |   |                     |   |                       |   |
| A9                    |                      |   |                    |   | 1 |   |                        |   |   |   |                       |   |                      |                   |   |   |                      |   | 28               |   |   |                     |   |                       |   |
| A11                   |                      |   |                    |   |   |   |                        |   |   |   |                       |   |                      |                   |   |   |                      |   | 4                |   |   |                     |   |                       |   |
| A13                   |                      |   |                    |   |   |   |                        |   |   |   |                       |   |                      |                   |   |   |                      |   |                  |   |   |                     |   |                       |   |

| Transect <sup>1</sup> | <i>D. marginatus</i> |   | <i>H. punctata</i> |   |   |   | <i>Hy. lusitanicum</i> |   |    |    | <i>Hy. marginatum</i> |   | <i>I. acuminatus</i> | <i>I. ricinus</i> |   |   | <i>Rh. annulatus</i> |   | <i>Rh. bursa</i> |   |   | <i>Rh. pusillus</i> |   | <i>Rh. sanguineus</i> |   |
|-----------------------|----------------------|---|--------------------|---|---|---|------------------------|---|----|----|-----------------------|---|----------------------|-------------------|---|---|----------------------|---|------------------|---|---|---------------------|---|-----------------------|---|
|                       | M                    | F | L                  | N | M | F | L                      | N | M  | F  | L                     | F | M                    | N                 | M | F | L                    | N | L                | M | F | M                   | F | M                     | F |
| A14                   |                      |   |                    |   |   |   |                        |   |    |    |                       |   |                      |                   |   |   |                      |   | 5                |   |   |                     |   |                       |   |
| A15                   |                      |   |                    |   |   |   |                        |   |    |    |                       |   |                      |                   |   |   |                      |   |                  |   |   |                     |   |                       |   |
| A16                   |                      |   |                    | 6 | 8 | 4 |                        |   | 21 | 14 |                       |   |                      | 1                 |   |   |                      |   |                  |   |   |                     |   |                       |   |
| FA9                   |                      |   |                    |   | 1 |   |                        | 2 |    |    |                       |   |                      |                   |   |   |                      |   | 37               |   |   |                     |   |                       |   |
| FA11                  |                      |   |                    |   |   |   |                        |   |    |    |                       |   |                      |                   |   |   |                      |   | 8                |   |   |                     |   |                       |   |
| FA13                  |                      |   |                    |   |   |   |                        |   |    |    |                       |   |                      |                   |   |   |                      |   | 57               |   |   |                     |   |                       |   |

<sup>1</sup>D1-D15: Transects in the Natural Protected Area of Doñana; FD: Buffer areas in Doñana; A1-A16: Transects in the Natural Protected Area of Los Alcornocales; FA: Buffer areas in Alcornocales; *D.*: *Dermacentor*; *H.*: *Haemaphysalis*; *Hy.*: *Hyalomma*; *I.*: *Ixodes*; *Rh.*: *Rhipicephalus*; L: Larvae; N: Nymph; M: male; F: Female

**Supplementary table 10.** Number of ticks captured in each transect in February 2019 in the Natural Protected Areas of Doñana and Los Alcornocales.

| Transect <sup>1</sup> | <i>D. marginatus</i> |   | <i>H. punctata</i> |   |   |   | <i>Hy. lusitanicum</i> |   |   |   | <i>Hy. marginatum</i> |   | <i>I. acuminatus</i> | <i>I. ricinus</i> |   |   | <i>Rh. annulatus</i> |   | <i>Rh. bursa</i> |   |   | <i>Rh. pusillus</i> |   | <i>Rh. sanguineus</i> |   |  |  |
|-----------------------|----------------------|---|--------------------|---|---|---|------------------------|---|---|---|-----------------------|---|----------------------|-------------------|---|---|----------------------|---|------------------|---|---|---------------------|---|-----------------------|---|--|--|
|                       | M                    | F | L                  | N | M | F | L                      | N | M | F | L                     | F | M                    | N                 | M | F | L                    | N | L                | M | F | M                   | F | M                     | F |  |  |
| D1                    |                      |   |                    |   |   |   |                        |   |   |   |                       |   |                      |                   |   |   |                      |   |                  |   |   |                     |   |                       |   |  |  |
| D2                    |                      |   |                    |   |   |   |                        |   |   |   |                       |   |                      |                   |   |   |                      |   |                  |   |   |                     |   |                       |   |  |  |
| D3                    | 1                    | 1 |                    |   |   |   |                        |   |   |   |                       |   |                      |                   |   |   |                      |   |                  |   |   |                     |   |                       |   |  |  |
| D4                    |                      |   |                    |   |   |   |                        |   |   |   |                       |   |                      |                   |   |   |                      |   |                  |   |   |                     |   |                       |   |  |  |
| D5                    |                      |   |                    |   |   |   |                        |   |   |   |                       |   |                      |                   |   |   |                      |   |                  |   |   |                     |   |                       |   |  |  |
| D6                    |                      |   |                    |   |   |   |                        |   |   |   |                       |   |                      |                   |   |   |                      |   |                  |   |   |                     |   |                       |   |  |  |
| D7                    |                      | 1 |                    |   |   |   |                        |   |   |   |                       |   |                      |                   |   |   |                      |   |                  |   |   |                     |   |                       |   |  |  |
| D8                    |                      |   |                    |   |   |   |                        |   |   |   |                       |   |                      |                   | 1 |   |                      |   |                  |   |   |                     |   |                       |   |  |  |
| D9                    |                      |   |                    |   |   |   |                        |   |   |   |                       |   |                      |                   |   |   |                      |   |                  |   |   |                     |   |                       |   |  |  |
| D10                   |                      |   |                    |   |   |   |                        |   |   |   |                       |   |                      |                   |   |   |                      |   |                  |   |   |                     |   |                       |   |  |  |
| D11                   |                      |   |                    |   |   |   |                        |   |   |   |                       |   |                      |                   |   |   |                      |   |                  |   |   |                     |   |                       |   |  |  |
| D12                   |                      |   |                    |   |   |   |                        |   |   |   |                       |   |                      |                   |   |   |                      |   |                  |   |   |                     |   |                       |   |  |  |
| D13                   |                      |   |                    |   |   |   |                        |   |   |   |                       |   |                      |                   |   |   | 8                    |   |                  |   |   |                     |   |                       |   |  |  |
| D15                   |                      |   |                    |   |   |   |                        |   |   |   |                       |   |                      |                   |   |   |                      |   |                  |   |   |                     |   |                       |   |  |  |
| FD5                   | 3                    | 2 |                    |   |   |   |                        |   |   |   |                       |   |                      |                   |   |   |                      |   |                  |   |   |                     |   |                       |   |  |  |
| FD7                   | 5                    | 5 |                    |   |   |   |                        |   |   |   |                       |   |                      |                   |   |   |                      |   |                  |   |   |                     |   |                       |   |  |  |
| FD10                  |                      |   |                    |   |   |   |                        |   |   |   |                       |   |                      |                   | 1 |   |                      |   |                  |   |   |                     |   |                       |   |  |  |
| A1                    |                      | 1 |                    |   |   |   |                        |   |   |   |                       |   |                      |                   |   |   |                      |   |                  |   |   |                     |   |                       |   |  |  |
| A2                    |                      |   |                    |   |   |   |                        |   |   |   |                       |   |                      |                   | 1 |   |                      |   |                  |   |   |                     |   |                       |   |  |  |
| A5                    |                      |   |                    |   |   |   |                        |   |   |   |                       |   | 1                    |                   |   |   |                      |   | 14               |   |   |                     |   |                       |   |  |  |
| A6                    |                      |   |                    |   |   |   |                        |   |   |   |                       |   |                      |                   |   |   |                      | 1 |                  |   |   |                     |   |                       |   |  |  |
| A7                    |                      |   |                    |   |   |   |                        |   |   |   |                       |   |                      |                   |   |   |                      |   |                  |   |   |                     |   |                       |   |  |  |
| A8                    |                      |   |                    |   |   |   |                        |   |   |   |                       |   |                      |                   |   |   |                      |   |                  |   |   |                     |   |                       |   |  |  |
| A9                    |                      |   |                    |   |   |   |                        |   |   |   |                       |   |                      |                   |   |   |                      |   |                  |   |   |                     |   |                       |   |  |  |
| A11                   |                      |   |                    |   |   |   |                        |   |   |   |                       |   |                      |                   |   |   |                      |   |                  |   |   |                     |   |                       |   |  |  |
| A13                   |                      |   |                    |   |   |   |                        |   |   |   |                       |   |                      |                   |   |   |                      |   |                  |   |   |                     |   |                       |   |  |  |
| A14                   |                      |   |                    |   |   |   |                        |   |   |   |                       |   |                      |                   |   |   |                      |   | 27               |   |   |                     |   |                       |   |  |  |
| A15                   |                      |   |                    |   |   |   |                        |   |   |   |                       |   |                      |                   |   |   |                      |   |                  |   |   |                     |   |                       |   |  |  |

| Transect <sup>1</sup> | <i>D. marginatus</i> |   | <i>H. punctata</i> |    |    |    | <i>Hy. lusitanicum</i> |   |    |    | <i>Hy. marginatum</i> |   | <i>I. acuminatus</i> | <i>I. ricinus</i> |   |   | <i>Rh. annulatus</i> |   | <i>Rh. bursa</i> |   |   | <i>Rh. pusillus</i> |   | <i>Rh. sanguineus</i> |   |
|-----------------------|----------------------|---|--------------------|----|----|----|------------------------|---|----|----|-----------------------|---|----------------------|-------------------|---|---|----------------------|---|------------------|---|---|---------------------|---|-----------------------|---|
|                       | M                    | F | L                  | N  | M  | F  | L                      | N | M  | F  | L                     | F | M                    | N                 | M | F | L                    | N | L                | M | F | M                   | F | M                     | F |
| A16                   |                      |   |                    | 33 | 18 | 13 |                        |   | 21 | 14 |                       |   |                      |                   |   |   |                      |   |                  |   |   |                     |   |                       |   |
| FA5                   |                      |   |                    |    |    |    |                        |   |    |    |                       |   |                      |                   |   |   |                      |   | 6                |   |   |                     |   |                       |   |
| FA6                   |                      |   |                    |    |    |    |                        |   |    |    |                       |   |                      |                   |   |   |                      |   | 2                |   |   |                     |   |                       |   |
| FA7                   |                      |   |                    |    | 1  |    |                        |   |    |    |                       |   |                      |                   |   |   |                      |   |                  |   |   |                     |   |                       |   |
| FA13                  |                      |   |                    |    |    |    |                        |   |    |    |                       |   |                      |                   |   |   |                      |   | 3                |   |   |                     |   |                       |   |

<sup>1</sup>D1-D15: Transects in the Natural Protected Area of Doñana; FD: Buffer areas in Doñana; A1-A16: Transects in the Natural Protected Area of Los Alcornocales; FA: Buffer areas in Alcornocales;  
*D.*: *Dermacentor*; *H.*: *Haemaphysalis*; *Hy.*: *Hyalomma*; *I.*: *Ixodes*; *Rh.*: *Rhipicephalus*; L: Larvae; N: Nymph; M: male; F: Female

**Supplementary table 11.** Number of ticks captured in each transect in March 2019 in the Natural Protected Areas of Doñana and Los Alcornocales.

| Transect <sup>1</sup> | <i>D. marginatus</i> |   | <i>H. punctata</i> |   |   |   | <i>Hy. lusitanicum</i> |   |   |   | <i>Hy. marginatum</i> |   | <i>I. acuminatus</i> | <i>I. ricinus</i> |   |   | <i>Rh. annulatus</i> |   | <i>Rh. bursa</i> |   |   | <i>Rh. pusillus</i> |   | <i>Rh. sanguineus</i> |   |   |
|-----------------------|----------------------|---|--------------------|---|---|---|------------------------|---|---|---|-----------------------|---|----------------------|-------------------|---|---|----------------------|---|------------------|---|---|---------------------|---|-----------------------|---|---|
|                       | M                    | F | L                  | N | M | F | L                      | N | M | F | L                     | F | M                    | N                 | M | F | L                    | N | L                | M | F | M                   | F | M                     | F |   |
| D1                    |                      |   |                    |   |   |   |                        |   |   |   |                       |   |                      |                   |   |   |                      |   |                  |   |   |                     |   |                       |   |   |
| D2                    |                      |   |                    |   |   |   |                        |   |   |   |                       |   |                      |                   |   |   |                      |   |                  |   |   |                     |   |                       |   |   |
| D3                    | 1                    |   |                    |   |   |   |                        |   |   |   |                       |   |                      |                   |   |   |                      |   |                  |   |   |                     |   |                       |   | 1 |
| D4                    |                      |   |                    |   |   |   |                        |   |   |   |                       |   |                      |                   |   |   |                      |   |                  |   |   |                     |   |                       |   |   |
| D5                    |                      |   |                    |   |   |   |                        |   | 1 |   |                       |   |                      |                   |   |   |                      |   |                  |   |   |                     |   |                       | 1 |   |
| D6                    |                      |   |                    |   |   |   |                        |   |   |   |                       |   |                      |                   |   |   |                      |   |                  |   |   |                     |   |                       |   |   |
| D7                    |                      |   |                    |   |   |   |                        |   |   |   |                       |   |                      |                   |   |   |                      |   |                  |   |   |                     |   |                       |   |   |
| D8                    |                      |   |                    |   |   |   |                        |   | 1 |   |                       |   |                      |                   |   |   |                      |   |                  |   |   |                     |   |                       |   |   |
| D9                    |                      |   |                    |   |   |   |                        |   |   |   |                       |   |                      |                   |   |   |                      |   |                  |   |   |                     |   |                       |   |   |
| D10                   |                      |   |                    |   |   |   |                        |   |   |   |                       |   |                      |                   |   |   |                      |   |                  |   |   |                     |   |                       |   |   |
| D11                   |                      |   |                    |   |   |   |                        |   |   |   |                       |   |                      |                   |   |   |                      |   |                  |   |   |                     |   |                       |   |   |
| D12                   |                      |   |                    |   |   |   |                        |   |   |   |                       |   |                      |                   |   |   |                      |   |                  |   |   |                     |   |                       |   |   |
| D13                   |                      |   |                    |   |   |   |                        |   |   |   |                       |   |                      |                   |   |   |                      |   |                  |   |   |                     |   |                       |   |   |
| D15                   |                      |   |                    |   |   |   |                        |   |   |   |                       |   |                      |                   |   |   |                      |   |                  |   |   |                     |   |                       |   |   |
| FD3                   | 1                    |   |                    |   |   |   |                        |   |   |   |                       |   |                      |                   |   |   |                      |   |                  |   |   |                     |   |                       | 1 |   |
| FD4                   |                      |   |                    |   |   |   |                        |   |   | 1 |                       |   |                      |                   |   |   |                      |   |                  |   |   |                     |   |                       |   |   |
| FD5                   |                      | 1 |                    |   |   |   |                        |   |   |   |                       |   |                      |                   |   |   |                      |   |                  |   |   |                     |   |                       |   |   |
| FD6                   |                      |   |                    |   |   |   |                        |   |   |   |                       |   |                      |                   |   |   |                      |   |                  |   |   |                     |   |                       |   | 1 |
| FD7                   |                      |   |                    |   |   |   |                        |   | 1 |   |                       |   |                      |                   |   |   |                      |   |                  |   |   |                     |   |                       |   |   |
| A1                    |                      |   |                    |   |   |   |                        |   |   | 1 |                       |   |                      |                   |   |   |                      |   |                  |   |   |                     |   |                       |   |   |
| A2                    | 1                    |   |                    |   |   |   |                        |   | 1 |   |                       |   |                      |                   |   |   |                      |   |                  |   |   |                     |   |                       |   |   |
| A5                    |                      |   |                    |   |   |   |                        |   |   |   |                       |   |                      |                   |   |   |                      |   |                  |   |   |                     |   |                       |   |   |
| A6                    |                      | 1 |                    |   |   |   |                        |   | 1 |   |                       |   |                      |                   | 1 |   |                      |   |                  |   |   |                     |   |                       |   | 1 |
| A7                    |                      |   |                    |   |   |   |                        |   |   |   |                       |   |                      |                   |   |   |                      |   |                  |   |   |                     |   |                       |   |   |
| A8                    |                      |   |                    |   |   |   |                        |   |   |   |                       |   |                      |                   |   |   |                      |   |                  |   |   |                     |   |                       |   |   |
| A9                    |                      |   |                    |   |   |   |                        |   |   |   |                       |   |                      |                   |   |   |                      |   |                  |   |   |                     |   |                       |   |   |
| A11                   |                      |   |                    |   |   |   |                        |   |   |   |                       |   |                      |                   |   |   |                      |   |                  |   |   |                     |   |                       |   |   |
| A13                   |                      |   |                    |   |   |   |                        |   |   |   |                       |   |                      |                   |   |   |                      |   |                  |   |   |                     |   |                       |   |   |
| A14                   |                      |   |                    |   |   |   |                        |   |   |   |                       |   |                      |                   |   |   |                      |   |                  |   |   |                     |   |                       |   |   |

| Transect <sup>1</sup> | <i>D. marginatus</i> |   | <i>H. punctata</i> |   |   |   | <i>Hy. lusitanicum</i> |   |   |   | <i>Hy. marginatum</i> |   | <i>I. acuminatus</i> | <i>I. ricinus</i> |   |   | <i>Rh. annulatus</i> |   | <i>Rh. bursa</i> |   |   | <i>Rh. pusillus</i> |   | <i>Rh. sanguineus</i> |   |  |
|-----------------------|----------------------|---|--------------------|---|---|---|------------------------|---|---|---|-----------------------|---|----------------------|-------------------|---|---|----------------------|---|------------------|---|---|---------------------|---|-----------------------|---|--|
|                       | M                    | F | L                  | N | M | F | L                      | N | M | F | L                     | F | M                    | N                 | M | F | L                    | N | L                | M | F | M                   | F | M                     | F |  |
| A15                   |                      |   |                    |   |   |   |                        |   |   |   |                       |   |                      |                   |   |   |                      |   |                  |   |   |                     |   |                       |   |  |
| A16                   |                      |   |                    |   |   |   |                        |   |   |   |                       |   |                      |                   |   |   |                      |   |                  |   |   |                     |   |                       |   |  |

<sup>1</sup>D1-D15: Transects in the Natural Protected Area of Doñana; FD: Buffer areas in Doñana; A1-A16: Transects in the Natural Protected Area of Los Alcornocales; FA: Buffer areas in Alcornocales;

*D.*: *Dermacentor*; *H.*: *Haemaphysalis*; *Hy.*: *Hyalomma*; *I.*: *Ixodes*; *Rh.*: *Rhipicephalus*; L: Larvae; N: Nymph; M: male; F: Female

**Supplementary table 12.** Tick densities in each transect from April 2018 to March 2019 in the Natural Protected Areas of Doñana and Los Alcornocales.

| Transect <sup>1</sup> | Apr-18 | May-18<br>Jun-18 | Aug-18 | Oct-18 | Nov-18<br>Dec-18 | Feb-19 | Mar-19 | Total No. of ticks | No. of samplings | Nº. of ticks per 100 m <sup>2</sup> |
|-----------------------|--------|------------------|--------|--------|------------------|--------|--------|--------------------|------------------|-------------------------------------|
| D1                    | 3      | 0                | 22     | 0      | 0                | 0      | 0      | 25                 | 7                | 3.6                                 |
| D2                    | 0      | 1                | 3      | 0      | 0                | 0      | 0      | 4                  | 7                | 0.6                                 |
| D3                    | 9      | 6                | 0      | 0      | 0                | 2      | 2      | 19                 | 7                | 2.7                                 |
| D4                    | 2      | 9                | 6      | 42     | 1                | 0      | 0      | 60                 | 7                | 8.6                                 |
| D5                    | 3      | 10               | 40     | 33     | 27               | 0      | 2      | 115                | 7                | 16.4                                |
| D6                    | 0      | 3                | 18     | 74     | 0                | 0      | 0      | 95                 | 7                | 13.6                                |
| D7                    | 0      | 10               | 1      | 0      | 17               | 1      | 0      | 29                 | 7                | 4.1                                 |
| D8                    | 0      | 32               | 186    | 1      | 0                | 1      | 1      | 221                | 7                | 31.6                                |
| D9                    | 2      | 2                | 0      | 0      | 0                | 0      | 0      | 4                  | 7                | 0.6                                 |
| D10                   | 2      | 0                | 0      | 0      | 0                | 0      | 0      | 2                  | 7                | 0.3                                 |
| D11                   | 0      | 3                | 28     | 0      | 0                | 0      | 0      | 31                 | 7                | 4.4                                 |
| D12                   | 4      | 2                | 0      | 0      | 0                | 0      | 0      | 6                  | 7                | 0.9                                 |
| D13                   | 2      | 1                | 181    | 0      | 0                | 8      | 0      | 192                | 7                | 27.4                                |
| D14                   | 0      | 2                |        |        |                  |        |        | 2                  | 2                | 1.0                                 |
| D15                   | 0      | 2                | 3      | 1      | 3                | 0      | 0      | 9                  | 7                | 1.3                                 |
| FD1                   |        |                  |        | 1      |                  |        |        | 1                  | 1                | 1.0                                 |
| FD2                   |        |                  |        | 5      |                  |        |        | 5                  | 1                | 5.0                                 |
| FD3                   |        |                  |        |        |                  |        | 2      | 2                  | 1                | 2.0                                 |
| FD4                   |        |                  | 0      | 5      | 1                |        | 1      | 7                  | 4                | 1.8                                 |
| FD5                   |        |                  |        |        | 47               | 5      | 1      | 53                 | 3                | 17.7                                |
| FD6                   |        |                  | 26     | 4      | 1                |        | 1      | 32                 | 4                | 8.0                                 |
| FD7                   |        |                  |        | 1      | 10               | 10     | 1      | 22                 | 4                | 5.5                                 |
| FD8                   |        |                  | 102    | 1      |                  |        |        | 103                | 2                | 51.5                                |
| FD9                   |        |                  |        | 2      |                  |        |        | 2                  | 1                | 2.0                                 |
| FD10                  |        |                  |        |        |                  | 1      |        | 1                  | 1                | 1.0                                 |
| FD12                  |        |                  |        | 1      |                  |        |        | 1                  | 1                | 1.0                                 |

| Transect <sup>1</sup> | Apr-18 | May-18<br>Jun-18 | Aug-18 | Oct-18 | Nov-18<br>Dec-18 | Feb-19 | Mar-19 | Total No. of ticks | No. of samplings | Nº. of ticks per 100 m <sup>2</sup> |
|-----------------------|--------|------------------|--------|--------|------------------|--------|--------|--------------------|------------------|-------------------------------------|
| FD13                  |        |                  |        | 1      |                  |        |        | 1                  | 1                | 1.0                                 |
| A1                    | 26     | 10               | 33     | 4      |                  | 1      | 1      | 75                 | 7                | 10.7                                |
| A2                    | 0      | 21               | 12     | 6      | 27               | 1      | 2      | 69                 | 7                | 9.9                                 |
| A3                    | 0      |                  |        |        |                  |        |        | 0                  | 1                | 0.0                                 |
| A4                    | 0      | 1                |        |        |                  |        |        | 1                  | 2                | 0.5                                 |
| A5                    | 1      | 7                | 0      | 2      | 7                | 15     | 0      | 32                 | 7                | 4.6                                 |
| A6                    | 4      | 13               | 4      | 40     | 0                | 1      | 4      | 66                 | 7                | 9.4                                 |
| A7                    | 4      | 143              | 22     | 1      | 0                | 0      | 0      | 170                | 7                | 24.3                                |
| A8                    | 1      | 179              | 19     | 4      | 0                | 0      | 0      | 203                | 7                | 29.0                                |
| A9                    | 0      | 3                | 214    | 8      | 29               | 0      | 0      | 254                | 7                | 36.3                                |
| A10                   | 0      |                  |        |        |                  |        |        | 0                  | 1                | 0.0                                 |
| A11                   | 0      | 8                | 63     | 5      | 4                | 0      | 0      | 80                 | 7                | 11.4                                |
| A12                   | 0      | 0                |        |        |                  |        |        | 0                  | 2                | 0.0                                 |
| A13                   | 0      | 4                | 250    | 6      | 0                | 0      | 0      | 260                | 7                | 37.1                                |
| A14                   | 0      | 18               | 154    | 20     | 5                | 27     | 0      | 224                | 7                | 32.0                                |
| A15                   |        |                  |        | 2      | 0                | 0      | 0      | 2                  | 4                | 0.5                                 |
| A16                   |        |                  | 1356   | 382    | 54               | 99     | 0      | 1891               | 5                | 378.2                               |
| FA5                   |        |                  | 3      |        |                  | 6      | 0      | 9                  | 3                | 3.0                                 |
| FA6                   |        |                  | 6      |        |                  | 2      | 0      | 8                  | 3                | 2.7                                 |
| FA7                   |        |                  |        |        |                  | 1      | 0      | 1                  | 2                | 0.5                                 |
| FA8                   |        |                  | 36     |        |                  |        | 0      | 36                 | 2                | 18.0                                |
| FA9                   |        |                  | 0      | 51     | 40               |        | 0      | 91                 | 4                | 22.8                                |
| FA11                  |        |                  |        | 5      | 8                |        | 0      | 13                 | 3                | 4.3                                 |
| FA13                  |        |                  |        |        | 57               | 3      | 0      | 60                 | 2                | 30.0                                |
| FA14                  |        |                  | 32     | 105    |                  |        | 0      | 137                | 3                | 45.7                                |

<sup>1</sup>AD1-D15: Transects in the Natural Protected Area of Doñana; FD: Buffer areas in Doñana; A1-A16: Transects in the Natural Protected Area of Los Alcornocales; FA: Buffer areas in Alcornocales

**Supplementary table 13.** Maximum Identities of the sequences obtained in this study comparing with public sequences of GenBank.

| Organisms                                     | Target genes | Species                            | No. of sequences            | GenBank acc. No. | Identities         |                    |                       |           |
|-----------------------------------------------|--------------|------------------------------------|-----------------------------|------------------|--------------------|--------------------|-----------------------|-----------|
|                                               |              |                                    |                             |                  | bp                 | %                  | GenBank Acc. No.      | QC        |
| Ticks                                         | 16S rRNA     | <i>Haemaphysalis punctata</i>      | 1                           | PZ060376         | 387/388            | 99.7               | MF002566*             | 100       |
|                                               |              |                                    | 3                           | PZ060377         | 404/404            | 100                | MG021187*             | 100       |
|                                               |              | <i>Hyalomma lusitanicum</i>        | 26                          | PZ060378         | 402/402            | 100                | ON366982              | 100       |
|                                               |              |                                    | 1                           |                  | 402/403            | 99.8               | ON366982*             | 100       |
|                                               |              |                                    |                             | PZ060379         | 392/392            | 100                | LC508317              | 97        |
|                                               |              |                                    | 1                           | PZ060380         | 401/403            | 99.5               | ON366982*             | 100       |
|                                               |              |                                    | 1                           | PZ060381         | 401/403            | 99.5               | ON366982*             | 100       |
|                                               |              | <i>Hyalomma marginatum</i>         | 1                           | PZ060382         | 403/404            | 99.8               | MW366630*             | 100       |
|                                               |              |                                    | 2                           | PZ060383         | 403/403            | 100                | MW366630*             | 100       |
|                                               |              | <i>Ixodes acuminatus</i>           | 1                           | PZ060384         | 407/409            | 99.5               | PQ144653              | 100       |
|                                               |              | <i>Ixodes ricinus/inopinatus</i>   | 1                           | PZ060385         | 406/407            | 100                | GU074598*             | 100       |
|                                               |              |                                    | 1                           | PZ060386         | 390/390            | 100                | OP375394*             | 100       |
|                                               |              | <i>Rhipicephalus annulatus</i>     | 4                           | PZ060387         | 402/403            | 99.8               | L34311*               | 100       |
|                                               |              | <i>Rhipicephalus bursa</i>         | 2                           | PZ060388         | 401/401            | 100                | OR773535*             | 100       |
| <i>Rhipicephalus pusillus</i>                 | 1            | PZ060389                           | 405/408                     | 99.3             | OL454855*          | 100                |                       |           |
| <i>Rhipicephalus sanguineus sensu stricto</i> | 2            | PZ060390                           | 384/384                     | 100              | OR946410           | 100                |                       |           |
|                                               | 2            | PZ060391                           | 412/412                     | 100              | JX997393*          | 100                |                       |           |
| <b>Borrelia</b>                               | <i>flaB</i>  | <i>Borrelia lusitaniae</i>         | 6                           | PZ112783         | 453/453<br>391/391 | 100                | CP132468              | 100       |
| <b>Rickettsia</b>                             | <i>ompA</i>  | <i>Candidatus Rickettsia rioja</i> | 39                          | PZ112789         | 488/488            | 100                | GQ404429*             | 100       |
|                                               |              |                                    | 2                           | PZ112790         | 486/488            | 99.6               | GQ404429*             | 100       |
|                                               |              |                                    | 2                           | PZ112791         | 487/488            | 99.8               | GQ404429*             | 100       |
|                                               |              | <i>Rickettsia aeschlimannii</i>    | 2                           | PZ112792         | 588/588            | 100                | HQ335157*             | 100       |
|                                               |              | <i>Rickettsia barbariae</i>        | 4                           | PZ112793         | 583/583<br>488/488 | 100                | MK028340*             | 100       |
|                                               |              |                                    | <i>Rickettsia massiliae</i> | 16               | PZ112794           | 590/590<br>490/490 | 100                   | CP000683* |
|                                               |              | 2                                  |                             | PZ112795         | 448/448            | 100                | CP003319*             | 100       |
|                                               |              | <i>Rickettsia monacensis</i>       | 5                           | PZ112796         | 598/603<br>590/590 | 100                | LN794217*<br>PP176516 | 100<br>98 |

| Organisms               | Target genes  | Species                    | No. of sequences | GenBank acc. No. | Identities         |                      |                  |                       |           |
|-------------------------|---------------|----------------------------|------------------|------------------|--------------------|----------------------|------------------|-----------------------|-----------|
|                         |               |                            |                  |                  | bp                 | %                    | GenBank Acc. No. | QC                    |           |
|                         |               | <i>Rickettsia raoultii</i> | 1                | PZ112797         | 587/587            | 100                  | AH015609         | 100                   |           |
|                         |               | <i>Rickettsia slovaca</i>  | 14               | PZ112798         | 588/588<br>491/491 | 100                  | CP002428         | 100                   |           |
|                         | <i>ompB</i>   | <i>R. barbariae</i>        | 3                | PZ112799         | 382/382            | 100                  | MK028339*        |                       |           |
|                         |               | <i>R. massiliae</i>        | 2                | PZ112800         | 483/483            | 100                  | CP000683*        | 100                   |           |
|                         |               |                            | 3                | PZ112801         | 483/483            | 100                  | CP003319*        | 100                   |           |
|                         | <i>Sca4</i>   | <i>R. barbariae</i>        | 2                | PZ112802         | 803/803            | 100                  | PP954858*        | 100                   |           |
| <b><i>Ehrlichia</i></b> | <i>groESL</i> |                            | 5                | PZ112784         | 1308/1310          | 99.9                 | KJ930191         | 98                    |           |
|                         |               |                            | 2                |                  | PZ112785           | 1089/1089<br>705/705 | 100              | OQ185227<br>KJ930193* | 82<br>100 |
|                         |               |                            | 4                | PZ059407         | 659/659            | 100                  | AF414399*        | 100                   |           |
|                         | 16S rRNA      |                            | 4                |                  |                    |                      |                  |                       |           |
|                         | <i>gltA</i>   |                            |                  | 4                | PZ112786           | 920/920              | 100              | KX987353*             | 100       |
|                         |               |                            |                  | 2                | PZ112787           | 848/920              | 92.2             | AF311965              | 100       |
| 1                       |               |                            |                  | PZ112788         | 646/647            | 99.9                 | OQ185264*        | 100                   |           |

\* among others
